# Supplementary material for: Glycan Masking of Plasmodium vivax Duffy Binding Protein for Probing Protein Binding Function and Vaccine Development
Source: PubMed Central journal article supplement (PMC3681752; doi:10.1371/journal.ppat.1003420), 2013-06-13
Supplement: ppat.1003420.s001.pdf [file ppat.1003420.s001.pdf]

### Wild type

D H K K T I S S A I I N H A F L Q N T V M K N C N Y K R K R R E R D W D C N T  
K K D V C I P D R R Y Q L C M K E L T N L V **N N T** D T N F H R D I T F R K L Y  
L K R K L I Y D A A V E G D L L L K L N N Y R Y N K D F C K D I R W S L G D F  
G D I I M G T D M E G I G Y S K V V E N N L R S I F G T D E K A Q Q R R K Q W  
W **N E S** K A Q I W T A M M Y S V K K R L K G N F I W I C K L N V A V N I E P Q  
I Y R W I R E W G R D Y V S E L P T E V Q K L K E K C D G K I **N Y T** D K K V C  
K V P P C Q N A C K S Y D Q W I T R K K N Q W D V L S N K F I S V K N A E K V  
Q T A G I V T P Y D I L K Q E L D E F N E V A F E N E I N K R D G A Y I E L C  
V C S V E E A K K N T Q E V V T N V D N A A K S Q A T N S N **P I S Q** P V D S S  
K A E K V P

### STBP glycan

D H K K T I S S A I I N H A F L Q N T V M K N C N Y K R K R R E R D W D C N T  
K K D V C I P D R R Y Q L C M K E L T N L V **N N T** D T N F H R D I T F R K L Y  
L K R K L I Y D A A V E G D L L L K L N N Y R Y N K D F C K D I R W S L G D F  
G D I I M G T D M E G I G Y S K V V E N N L R S I F G T D E K A Q Q R R K Q W  
W **N E S** K A Q I W T A M M Y S V K K R L K G N F **N W T** C K L N V A V N I E P Q  
I Y R W I R E W G R D Y V S E L P T E V Q K L K E K C D G K I **N Y T** D K K V C  
K V P P C Q N A C K S Y D Q W I T R K K N Q W D V L S N K F I S V K N A E K V  
Q T A G I V T P Y D I L K Q E L D E F N E V A F E N E I N K R D G A Y I E L C  
V C S V E E A K K N T Q E V V T N V D N A A K S Q A T N S N **P I S Q** P V D S S  
K A E K V P

### P1

D H K K T I S S A I I N H A F L Q N T V M K N C N Y K R K R R E R D W D C N T  
K K D V C I P D R R Y Q L C M K E L T N L V **N N T** D T N F H R **N I T** F R K L Y  
L K R K L I Y D A A V E G D L L L K L N N Y R Y N K D F C K D I R W S L G D F  
G D I I M G T D M E G I G Y S K V V E N N L R S I F G T D E K A Q Q R R K Q W  
W **N E S** K A Q I W T A M M Y S V K K R L K G N F I W I C K L N V A V N I E P Q  
I Y R W I R E W G R D Y V S E L P T E V Q K L K E K C D G K I **N Y T** D K K V C  
K V P P C Q N A C K S Y D Q W I T R K K N Q W D V L S N K F I S V K **N A S** K V  
Q T A G I V T P Y D I L K Q E L D E F **N E T** A F E N E I N K R D G A Y I E L C  
V C S V E E A K K N T Q E V V T N V D N A A K S Q A T N S N **P I S Q** P V D S S  
K A E K V P

### Max

D H K K T I S S A I I N H A F L Q N T V M K N C N Y K R K R R E R D W D C N **N**  
**K S** D V C I P D R R Y Q L C M K E L T N L V **N N T** D T N F H R **N I T** F R K L Y  
L K R K L I Y D A A V E G D L L L K L N N Y R Y N K D F C K D I R W S L G D F  
G D I I M G T D M E G I G Y S K V V E N N L R S I F G T D E **N A S** Q R R K Q W  
W **N E S** K A Q I W T A M M Y S V K K R L K G N F I W I C K L N V A V N I E P Q  
I Y R W I R E W G R D Y V S E L P T E V Q K L **N E S** C D G K I **N Y T** D K K V C  
K V P P C Q N A C K S Y D Q W I T R K K N Q W D V L S N K F I S V K **N A S** K V  
**N T T** G I V T P Y D I L K Q E L D E F **N E T** A F E N E I **N K S** D G A Y I E L C  
V C S V E E A K K N T Q E V V T N V D N A A K S Q A T N S N **P I S Q** P V D S S  
K A E K V P
