# Supplementary material for: Glycan Masking of Plasmodium vivax Duffy Binding Protein for Probing Protein Binding Function and Vaccine Development
Source: PubMed Central journal article supplement (PMC3681752; doi:10.1371/journal.ppat.1003420), 2013-06-13
Supplement: ppat.1003420.s002.pdf [file ppat.1003420.s002.pdf]

|    |           |     |            |      |                                                   |
|----|-----------|-----|------------|------|---------------------------------------------------|
| gi | 11120233  | gb  | AAG30847.1 |      | DHKKTISSAI INHAFLQNTVMKNCNYKRKRERDWCNTKKDVCIPDRRY |
| gi | 12407747  | gb  | AAG53634.1 |      | DHKKTISSAI INHAFLQNTVMKNCNYKRKRERDWCNTKKDVCIPDRRY |
| gi | 18766659  | gb  | AAL79050.1 | AF46 | -----DRRY                                         |
| gi | 18766819  | gb  | AAL79130.1 | AF46 | -----DRRY                                         |
| gi | 63146462  | gb  | AAZ34059.1 |      | -----DRRY                                         |
| gi | 63146616  | gb  | AAZ34136.1 |      | -----DRRY                                         |
| gi | 11138983  | gb  | AAG31571.1 |      | DHKKTISSAI INHAFLQNTVMKNCNYKRKRERDWCNTKKDVCIPDRRY |
| gi | 73697858  | gb  | AAZ81532.1 |      | DHKKTISSAI INHAFLQNTVMKNCNYKRKRERDWCNTKKDVCIPDRRY |
| gi | 73697846  | gb  | AAZ81526.1 |      | DHKKTISSAI INHAFLQNTVMKNCNYKRKRERDWCNTKKDVCIPDRRY |
| gi | 12004297  | gb  | AAG43989.1 |      | -----ERDWCNTKKDVCIPDRRY                           |
| gi | 12004299  | gb  | AAG43990.1 |      | -----ERDWCNTKKDVCIPDRRY                           |
| gi | 73697866  | gb  | AAZ81536.1 |      | DHKKTISSAI INHAFLQNTVMKNCNYKRKRERDWCNTKKDVCIPDRRY |
| gi | 73697848  | gb  | AAZ81527.1 |      | DHKKTISSAI INHAFLQNTVMKNCNYKRKRERDWCNTKKDVCIPDRRY |
| gi | 73697856  | gb  | AAZ81531.1 |      | DHKKTISSAI INHAFLQNTVMKNCNYKRKRERDWCNTKKDVCIPDRRY |
| gi | 73697862  | gb  | AAZ81534.1 |      | DHKKTISSAI INHAFLQNTVMKNCNYKRKRERDWCNTKKDVCIPDRRY |
| gi | 160276    | gb  | AAA63423.1 |      | DHKKTISSAI INHAFLQNTVMKNCNYKRKRERDWCNTKKDVCIPDRRY |
| gi | 73697844  | gb  | AAZ81525.1 |      | DHKKTISSAI INHAFLQNTVMKNCNYKRKRERDWCNTKKDVCIPDRRY |
| gi | 339961368 | pdb | 3RRC       | A    | -----MGNTVMKNCNYKRKRERDWCNTKKDVCIPDRRY            |
| gi | 339961369 | pdb | 3RRC       | B    | -----MGNTVMKNCNYKRKRERDWCNTKKDVCIPDRRY            |
| gi | 255914751 | dbj | BAH96577.1 |      | -----ERDWCNTKKDVCIPDRRY                           |
| gi | 224926624 | gb  | ACN69874.1 |      | ----TISSAI INHAFLQNTVMKNCNYKRKRERDWCNTKKDVCIPDRRY |
| gi | 224926626 | gb  | ACN69875.1 |      | ----TISSAI INHAFLQNTVMKNCNYKRKRERDWCNTKKDVCIPDRRY |
| gi | 224926628 | gb  | ACN69876.1 |      | ----TISSAI INHAFLQNTVMKNCNYKRKRERDWCNTKKDVCIPDRRY |
| gi | 224926630 | gb  | ACN69877.1 |      | ----TISSAI INHAFLQNTVMKNCNYKRKRERDWCNTKKDVCIPDRRY |
| gi | 224926632 | gb  | ACN69878.1 |      | ----TISSAI INHAFLQNTVMKNCNYKRKRERDWCNTKKDVCIPDRRY |
| gi | 224926634 | gb  | ACN69879.1 |      | ----TISSAI INHAFLQNTVMKNCNYKRKRERDWCNTKKDVCIPDRRY |
| gi | 224926636 | gb  | ACN69880.1 |      | ----TISSAI INHAFLQNTVMKNCNYKRKRERDWCNTKKDVCIPDRRY |
| gi | 224926638 | gb  | ACN69881.1 |      | ----TISSAI INHAFLQNTVMKNCNYKRKRERDWCNTKKDVCIPDRRY |
| gi | 224926640 | gb  | ACN69882.1 |      | ----TISSAI INHAFLQNTVMKNCNYKRKRERDWCNTKKDVCIPDRRY |
| gi | 224926642 | gb  | ACN69883.1 |      | ----TISSAI INHAFLQNTVMKNCNYKRKRERDWCNTKKDVCIPDRRY |
| gi | 224926644 | gb  | ACN69884.1 |      | ----TISSAI INHAFLQNTVMKNCNYKRKRERDWCNTKKDVCIPDRRY |
| gi | 224926646 | gb  | ACN69885.1 |      | ----TISSAI INHAFLQNTVMKNCNYKRKRERDWCNTKKDVCIPDRRY |
| gi | 224926648 | gb  | ACN69886.1 |      | ----TISSAI INHAFLQNTVMKNCNYKRKRERDWCNTKKDVCIPDRRY |
| gi | 224926650 | gb  | ACN69887.1 |      | ----TISSAI INHAFLQNTVMKNCNYKRKRERDWCNTKKDVCIPDRRY |
| gi | 224926652 | gb  | ACN69888.1 |      | ----TISSAI INHAFLQNTVMKNCNYKRKRERDWCNTKKDVCIPDRRY |
| gi | 224926654 | gb  | ACN69889.1 |      | ----TISSAI INHAFLQNTVMKNCNYKRKRERDWCNTKKDVCIPDRRY |
| gi | 224926656 | gb  | ACN69890.1 |      | ----TISSAI INHAFLQNTVMKNCNYKRKRERDWCNTKKDVCIPDRRY |
| gi | 224926658 | gb  | ACN69891.1 |      | ----TISSAI INHAFLQNTVMKNCNYKRKRERDWCNTKKDVCIPDRRY |
| gi | 224926660 | gb  | ACN69892.1 |      | ----TISSAI INHAFLQNTVMKNCNYKRKRERDWCNTKKDVCIPDRRY |
| gi | 224926662 | gb  | ACN69893.1 |      | ----TISSAI INHAFLQNTVMKNCNYKRKRERDWCNTKKDVCIPDRRY |
| gi | 224926664 | gb  | ACN69894.1 |      | ----TISSAI INHAFLQNTVMKNCNYKRKRERDWCNTKKDVCIPDRRY |
| gi | 224926666 | gb  | ACN69895.1 |      | ----TISSAI INHAFLQNTVMKNCNYKRKRERDWCNTKKDVCIPDRRY |
| gi | 224926668 | gb  | ACN69896.1 |      | ----TISSAI INHAFLQNTVMKNCNYKRKRERDWCNTKKDVCIPDRRY |
| gi | 224926670 | gb  | ACN69897.1 |      | ----TISSAI INHAFLQNTVMKNCNYKRKRERDWCNTKKDVCIPDRRY |
| gi | 224926672 | gb  | ACN69898.1 |      | ----TISSAI INHAFLQNTVMKNCNYKRKRERDWCNTKKDVCIPDRRY |
| gi | 224926674 | gb  | ACN69899.1 |      | ----TISSAI INHAFLQNTVMKNCNYKRKRERDWCNTKKDVCIPDRRY |
| gi | 224926676 | gb  | ACN69900.1 |      | ----TISSAI INHAFLQNTVMKNCNYKRKRERDWCNTKKDVCIPDRRY |
| gi | 224926678 | gb  | ACN69901.1 |      | ----TISSAI INHAFLQNTVMKNCNYKRKRERDWCNTKKDVCIPDRRY |
| gi | 224926680 | gb  | ACN69902.1 |      | ----TISSAI INHAFLQNTVMKNCNYKRKRERDWCNTKKDVCIPDRRY |
| gi | 224926682 | gb  | ACN69903.1 |      | ----TISSAI INHAFLQNTVMKNCNYKRKRERDWCNTKKDVCIPDRRY |
| gi | 224926684 | gb  | ACN69904.1 |      | ----TISSAI INHAFLQNTVMKNCNYKRKRERDWCNTKKDVCIPDRRY |
| gi | 224926686 | gb  | ACN69905.1 |      | ----TISSAI INHAFLQNTVMKNCNYKRKRERDWCNTKKDVCIPDRRY |
| gi | 224926688 | gb  | ACN69906.1 |      | ----TISSAI INHAFLQNTVMKNCNYKRKRERDWCNTKKDVCIPDRRY |
| gi | 224926690 | gb  | ACN69907.1 |      | ----TISSAI INHAFLQNTVMKNCNYKRKRERDWCNTKKDVCIPDRRY |
| gi | 224926692 | gb  | ACN69908.1 |      | ----TISSAI INHAFLQNTVMKNCNYKRKRERDWCNTKKDVCIPDRRY |
| gi | 224926694 | gb  | ACN69909.1 |      | ----TISSAI INHAFLQNTVMKNCNYKRKRERDWCNTKKDVCIPDRRY |
| gi | 224926696 | gb  | ACN69910.1 |      | ----TISSAI INHAFLQNTVMKNCNYKRKRERDWCNTKKDVCIPDRRY |
| gi | 224926698 | gb  | ACN69911.1 |      | ----TISSAI INHAFLQNTVMKNCNYKRKRERDWCNTKKDVCIPDRRY |
| gi | 224926700 | gb  | ACN69912.1 |      | ----TISSAI INHAFLQNTVMKNCNYKRKRERDWCNTKKDVCIPDRRY |



|    |           |    |            |                                                   |
|----|-----------|----|------------|---------------------------------------------------|
| gi | 213868281 | gb | ACJ54187.1 | DHKKTISSAI INHAFLQNTVMKNCNYKRKRERDWCNTKKDVCIPDRRY |
| gi | 213868283 | gb | ACJ54188.1 | DHKKTISSAI INHAFLQNTVMKNCNYKRKRERDWCNTKKDVCIPDRRY |
| gi | 213868285 | gb | ACJ54189.1 | DHKKTISSAI INHAFLQNTVMKNCNYKRKRERDWCNTKKDVCIPDRRY |
| gi | 213868287 | gb | ACJ54190.1 | DHKKTISSAI INHAFLQNTVMKNCNYKRKRERDWCNTKKDVCIPDRRY |
| gi | 213868289 | gb | ACJ54191.1 | DHKKTISSAI INHAFLQNTVMKNCNYKRKRERDWCNTKKDVCIPDRRY |
| gi | 213868291 | gb | ACJ54192.1 | DHKKTISSAI INHAFLQNTVMKNCNYKRKRERDWCNTKKDVCIPDRRY |
| gi | 213868293 | gb | ACJ54193.1 | DHKKTISSAI INHAFLQNTVMKNCNYKRKRERDWCNTKKDVCIPDRRY |
| gi | 213868295 | gb | ACJ54194.1 | DHKKTISSAI INHAFLQNTVMKNCNYKRKRERDWCNTKKDVCIPDRRY |
| gi | 213868297 | gb | ACJ54195.1 | DHKKTISSAI INHAFLQNTVMKNCNYKRKRERDWCNTKKDVCIPDRRY |
| gi | 213868299 | gb | ACJ54196.1 | DHKKTISSAI INHAFLQNTVMKNCNYKRKRERDWCNTKKDVCIPDRRY |
| gi | 213868301 | gb | ACJ54197.1 | DHKKTISSAI INHAFLQNTVMKNCNYKRKRERDWCNTKKDVCIPDRRY |

: \*\*\*

|    |           |     |            |                                                    |                                                    |
|----|-----------|-----|------------|----------------------------------------------------|----------------------------------------------------|
| gi | 11120233  | gb  | AAG30847.1 | QLCMKELTNLVNNTDTNFHSDITFRKLYLKRKLIYDAAVEGDLLLKLNNY |                                                    |
| gi | 12407747  | gb  | AAG53634.1 | QLCMKELTNLVNNTDTNFHSDITFRKLYLKRKLIYDAAVEGDLLLKLNNY |                                                    |
| gi | 18766659  | gb  | AAL79050.1 | AF46                                               | QLCMKELTNLVNNTDTNFHRDITFRKLYLKRKLIYDAAVEGDLLLKLNNY |
| gi | 18766819  | gb  | AAL79130.1 | AF46                                               | QLCMKELTNLVNNTDTNFHSDITFRKLYLKRKLIYDAAVEGDLLLKLNNY |
| gi | 63146462  | gb  | AAZ34059.1 | QLCMKELTNLVNNTDTNFHSDITFRKLYLKRKLIYDAAVEGDLLLKLNNY |                                                    |
| gi | 63146616  | gb  | AAZ34136.1 | QLCMKELTNLVNNTDTNFHRDITFRKLYLKRKLIYDAAVEGDLLLKLNNY |                                                    |
| gi | 11138983  | gb  | AAG31571.1 | QLCMKELTNLVNNTDTNFHSDITFRKLYLKRKLIYDAAVEGDLLLKLNNY |                                                    |
| gi | 73697858  | gb  | AAZ81532.1 | QLCMKELTNLVNNTDTNFHSDITFRKLYLKRKLIYDAAVEGDLLLKLNNY |                                                    |
| gi | 73697846  | gb  | AAZ81526.1 | QLCMKELTNLVNNTDTNFHRDITFRKLYLKRKLIYDAAVEGDLLLKLNNY |                                                    |
| gi | 12004297  | gb  | AAG43989.1 | QLCMKELTNLVNNTDTNFHRDITFRKLYLKRKLIYDAAVEGDLLLKLNNY |                                                    |
| gi | 12004299  | gb  | AAG43990.1 | QLCMKELTNLVNNTDTNFHRDITFRKLYLKRKLIYDAAVEGDLLLKLNNY |                                                    |
| gi | 73697866  | gb  | AAZ81536.1 | QLCMKELTNLVNNTDTNFHRDITFRKLYLKRKLIYDAAVEGDLLLKLNNY |                                                    |
| gi | 73697848  | gb  | AAZ81527.1 | QLCMKELTNLVNNTDTNFHRDITFRKLYLKRKLIYDAAVEGDLLLKLNNY |                                                    |
| gi | 73697856  | gb  | AAZ81531.1 | QLCMKELTNLVNNTDTNFHSDITFRKLYLKRKLIYDAAVEGDLLLKLNNY |                                                    |
| gi | 73697862  | gb  | AAZ81534.1 | QLCMKELTNLVNNTDTNLHSDITFRKLYLKRKLIYDAAVEGDLLLKLNNY |                                                    |
| gi | 160276    | gb  | AAA63423.1 | QLCMKELTNLVNNTDTNFHRDITFRKLYLKRKLIYDAAVEGDLLLKLNNY |                                                    |
| gi | 73697844  | gb  | AAZ81525.1 | QLCMKELTNLVNNTDTNFHRDITFRKLYLKRKLIYDAAVEGDLLLKLNNY |                                                    |
| gi | 339961368 | pdb | 3RRC   A   | QLCMKELTNLVNNTDTNFHRDITFRKLYLKRKLIYDAAVEGDLLLKLNNY |                                                    |
| gi | 339961369 | pdb | 3RRC   B   | QLCMKELTNLVNNTDTNFHRDITFRKLYLKRKLIYDAAVEGDLLLKLNNY |                                                    |
| gi | 255914751 | dbj | BAH96577.1 | QLCMKELTNLVNNTDTNFHRDITFRKLYLKRKLIYDAAVEGDLLLKLNNY |                                                    |
| gi | 224926624 | gb  | ACN69874.1 | QLCMKELTNLVNNTDTNFHRDITFRKLYLKRKLIYDAAVEGDLLLKLNNY |                                                    |
| gi | 224926626 | gb  | ACN69875.1 | QLCMKELTNLVNNTDTNFHRDITFRKLYLKRKLIYDAAVEGDLLLKLNNY |                                                    |
| gi | 224926628 | gb  | ACN69876.1 | QLCMKELTNLVNNTDTNFHRDITFRKLYLKRKLIYDAAVEGDLLLKLNNY |                                                    |
| gi | 224926630 | gb  | ACN69877.1 | QLCMKELTNLVNNTDTNFHSDITFRKLYLKRKLIYDAAVEGDLLLKLNNY |                                                    |
| gi | 224926632 | gb  | ACN69878.1 | QLCMKELTNLVNNTDTNFHRDITFRKLYLKRKLIYDAAVEGDLLLKLNNY |                                                    |
| gi | 224926634 | gb  | ACN69879.1 | QLCMKELTNLVNNTDTNFHRDITFRKLYLKRKLIYDAAVEGDLLLKLNNY |                                                    |
| gi | 224926636 | gb  | ACN69880.1 | QLCMKELTNLVNNTDTNFHRDITFRKLYLKRKLIYDAAVEGDLLLKLNNY |                                                    |
| gi | 224926638 | gb  | ACN69881.1 | QLCMKELTNLVNNTDTNFHRDITFRKLYLKRKLIYDAAVEGDLLLKLNNY |                                                    |
| gi | 224926640 | gb  | ACN69882.1 | QLCMKELTNLVNNTDTNFHRDITFRKLYLKRKLIYDAAVEGDLLLKLNNY |                                                    |
| gi | 224926642 | gb  | ACN69883.1 | QLCMKELTNLVNNTDTNFHRDITFRKLYLKRKLIYDAAVEGDLLLKLNNY |                                                    |
| gi | 224926644 | gb  | ACN69884.1 | QLCMKELTNLVNNTDTNFHRDITFRKLYLKRKLIYDAAVEGDLLLKLNNY |                                                    |
| gi | 224926646 | gb  | ACN69885.1 | QLCMKELTNLVNNTDTNFHRDITFRKLYLKRKLIYDAAVEGDLLLKLNNY |                                                    |
| gi | 224926648 | gb  | ACN69886.1 | QLCMKELTNLVNNTDTNFHRDITFRKLYLKRKLIYDAAVEGDLLLKLNNY |                                                    |
| gi | 224926650 | gb  | ACN69887.1 | QLCMKELTNLVNNTDTNFHRDITFRKLYLKRKLIYDAAVEGDLLLKLNNY |                                                    |
| gi | 224926652 | gb  | ACN69888.1 | QLCMKELTNLVNNTDTNFHRDITFRKLYLKRKLIYDAAVEGDLLLKLNNY |                                                    |
| gi | 224926654 | gb  | ACN69889.1 | QLCMKELTNLVNNTDTNFHRDITFRKLYLKRKLIYDAAVEGDLLLKLNNY |                                                    |
| gi | 224926656 | gb  | ACN69890.1 | QLCMKELTNLVNNTDPNFHRDITFRKLYLKRKLIYDAAVEGDLLLKLNNY |                                                    |
| gi | 224926658 | gb  | ACN69891.1 | QLCMKELTNLVNNTDTNFHRDITFRKLYLKRKLIYDAAVEGDLLLKLNNY |                                                    |
| gi | 224926660 | gb  | ACN69892.1 | QLCMKELTNLVNNTDTNFHRDITFRKLYLKRKLIYDAAVEGDLLLKLNNY |                                                    |
| gi | 224926662 | gb  | ACN69893.1 | QLCMKELTNLVNNTDTNFHRDITFRKLYLKRKLIYDAAVEGDLLLKLNNY |                                                    |
| gi | 224926664 | gb  | ACN69894.1 | QLCMKELTNLVNNTDTNLHSDITFRKLYLKRKLIYDAAVEGDLLLKLNNY |                                                    |
| gi | 224926666 | gb  | ACN69895.1 | QLCMKELTNLVNNTDTNFHRDITFRKLYLKRKLIYDAAVEGDLLLKLNNY |                                                    |
| gi | 224926668 | gb  | ACN69896.1 | QLCMKELTNLVNNTDTNFHRDITFRKLYLKRKLIYDAAVEGDLLLKLNNY |                                                    |
| gi | 224926670 | gb  | ACN69897.1 | QLCMKELTNLVNNTDTNFHRDITFRKLYLKRKLIYDAAVEGDLLLKLNNY |                                                    |
| gi | 224926672 | gb  | ACN69898.1 | QLCMKELTNLVNNTDTNFHRDITFRKLYLKRKLIYDAAVEGDLLLKLNNY |                                                    |
| gi | 224926674 | gb  | ACN69899.1 | QLCMKELTNLVNNTDTNFHRDITFRKLYLKRKLIYDAAVEGDLLLKLNNY |                                                    |



gi|224926796|gb|ACN69959.1| QLCMKELTNLVNNTDTNFHRDITFRKLYLKRKLIYDAAVEGDLLLKLNNY  
gi|224926798|gb|ACN69960.1| QLCMKELTNLVNNTDTNFHRDITFRKLYLKRKLIYDAAVEGDLLLKLNNY  
gi|224926800|gb|ACN69961.1| QLCMKELTNLVNNTDTNFHRDITFRKLYLKRKLIYDAAVEGDLLLKLNNY  
gi|224926802|gb|ACN69962.1| QLCMKELTNLVNNTDTNFHRDITFRKLYLKRKLIYDAAVEGDLLLKLNNY  
gi|224926804|gb|ACN69963.1| QLCMKELTNLVNNTDTNFHSDITFRKLYLKRKLIYDAAVEGDLLLKLNNY  
gi|224926806|gb|ACN69964.1| QLCMKELTNLVNNTDTNFHRDITFRKLYLKRKLIYDAAVEGDLLLKLNNY  
gi|224926808|gb|ACN69965.1| QLCMKELTNLVNNTDTNLHSDITFRKLYLKRKLIYDAAVEGDLLLKLNNY  
gi|224926810|gb|ACN69966.1| QLCMKELTNLVNNTDTNFHRDITFRKLYLKRKLIYDAAVEGDLLLKLNNY  
gi|224926812|gb|ACN69967.1| QLCMKELTNLVNNTDTNFHRDITFRKLYLKRKLIYDAAVEGDLLLKLNNY  
gi|224926814|gb|ACN69968.1| QLCMKELTNLVNNTDTNFHRDITFRKLYLKRKLIYDAAVEGDLLLKLNNY  
gi|224926816|gb|ACN69969.1| QLCMKELTNLVNNTDTNFHRDITFRKLYLKRKLIYDAAVEGDLLLKLNNY  
gi|224926818|gb|ACN69970.1| QLCMKELTNLVNNTDTNFHRDITFRKLYLKRKLIYDAAVEGDLLLKLNNY  
gi|224926820|gb|ACN69971.1| QLCMKELTNLVNNTDTNFHRDITFRKLYLKRKLIYDAAVEGDLLLKLNNY  
gi|213868281|gb|ACJ54187.1| QLCMKELTNLVNNTDTNLHSDITFRKLYLKRKLIYDAAVEGDLLLKLNNY  
gi|213868283|gb|ACJ54188.1| QLCMKELTNLVNNTDTNFHSDITFRKLYLKRKLIYDAAVEGDLLLKLNNY  
gi|213868285|gb|ACJ54189.1| QLCMKELTNLVNNTDTNFHRDITFRKLYLKRKLIYDAAVEGDLLLKLNNY  
gi|213868287|gb|ACJ54190.1| QLCMKELTNLVNNTDTNFHRDITFRKLYLKRKLIYDAAVEGDLLLKLNNY  
gi|213868289|gb|ACJ54191.1| QLCMKELTNLVNNTDTNFHRDITFRKLYLKRKLIYDAAVEGDLLLKLNNY  
gi|213868291|gb|ACJ54192.1| QLCMKELTNLVNNTDTNFHRDITFRKLYLKRKLIYDAAVEGDLLLKLNNY  
gi|213868293|gb|ACJ54193.1| QLCMKELTNLVNNTDTNFHRDITFRKLYLKRKLIYDAAVEGDLLLKLNNY  
gi|213868295|gb|ACJ54194.1| QLCMKELTNLVNNTDTNFHRDITFRKLYLKRKLIYDAAVEGDLLLKLNNY  
gi|213868297|gb|ACJ54195.1| QLCMKELTNLVNNTDTNFHRDITFRKLYLKRKLIYDAAVEGDLLLKLNNY  
gi|213868299|gb|ACJ54196.1| QLCMKELTNLVNNTDTNFHRDITFRKLYLKRKLIYDAAVEGDLLLKLNNY  
gi|213868301|gb|ACJ54197.1| QLCMKELTNLVNNTDTNFHRDITFRKLYLKRKLIYDAAVEGDLLLKLNNY  
\*\*\*\*\*.\*:\* \*\*\*\*\*:\*\*\*\*\*:\*\*\*\*\*

gi|11120233|gb|AAG30847.1| RYNKDFCKDIRWSLGDFGDIIMGTDMEGIGYSKVVENNRSIFGTGEKAQ  
gi|12407747|gb|AAG53634.1| RYNKDFCKDIRWSLGDFGDIIMGTDMEGIGYSKVVENNLSIFGTGEKAQ  
gi|18766659|gb|AAL79050.1| AF46 RYNKDFCKDIRWSLGDFGDIIMGTDMEGIGYSKVVENNLSIFGTDEKAQ  
gi|18766819|gb|AAL79130.1| AF46 RYNKDFCKDIRWSLGDFGDIIMGTDMEGIGYSKVVENNLSIFGTGEKAQ  
gi|63146462|gb|AAY34059.1| RYNKDFCKDIRWSLGDFGDIIMGTDMEGIGYSKVVENNLSIFGTGEKAQ  
gi|63146616|gb|AAY34136.1| RYNKDFCKDIRWSLGDFGDIIMGTDMEGIGYSKVVENNLSIFGTDEKAQ  
gi|11138983|gb|AAG31571.1| RYNKDFCKDIRWSLGDFGDIIMGTDMEGIGYSKVVENNLSIFGTGEKAQ  
gi|73697858|gb|AAZ81532.1| RYNKDFCKDIRWSLGDFGDIIMGTDMEGIGYSKVVENNLSIFGTDEKAQ  
gi|73697846|gb|AAZ81526.1| RYNKDFCKDIRWSLGDFGDIIMGTDMEGIGYSKVVENNLSIFGTGEKAQ  
gi|12004297|gb|AAG43989.1| RYNKDFCKDIRWSLGDFGDIIMGTDMEGIGYSEVVENNLSIFGTGEKAQ  
gi|12004299|gb|AAG43990.1| RYNKDFCKDIRWSLGDFGDIIMGTDMEGIGYSKVVENNLSIFGTDEKAQ  
gi|73697866|gb|AAZ81536.1| RYNKDFCKDIRWSLGDFGDIIMGTDMEGIGYSKVVENNLSIFGTGEKAQ  
gi|73697848|gb|AAZ81527.1| RYNKDFCKDIRWSLGDFGDIIMGTDMEGIGYSKVVENNLSIFGTDEKAQ  
gi|73697856|gb|AAZ81531.1| RYNKDFCKDIRWSLGDFGDIIMGTDMEGIGYSKVVENNLSIFGTGKNAQ  
gi|73697862|gb|AAZ81534.1| RYNKDFCKDIRWSLGDFGDIIMGTDMEGIGYSKVVENNLSIFGTGKNAQ  
gi|160276|gb|AAA63423.1| RYNKDFCKDIRWSLGDFGDIIMGTDMEGIGYSKVVENNLSIFGTDEKAQ  
gi|73697844|gb|AAZ81525.1| RYNKDFCKDIRWSLGDFGDIIMGTDMEGIGYSKVVENNLSIFGTDEKAQ  
gi|339961368|pdb|3RRC|A RYNKDFCKDIRWSLGDFGDIIMGTDMEGIGYSKVVENNLSIFGTDEKAQ  
gi|339961369|pdb|3RRC|B RYNKDFCKDIRWSLGDFGDIIMGTDMEGIGYSKVVENNLSIFGTDEKAQ  
gi|255914751|dbj|BAH96577.1| RYNKDFCKDIRWSLGDFGDIIMGTDMEGIGYSKVVENNLSIFGTGEKAQ  
gi|224926624|gb|ACN69874.1| RYNKDFCKDIRWSLGDFGDIIMGTDMEGIGYSEVVENNLSIFGTGEQAQ  
gi|224926626|gb|ACN69875.1| RYNKDFCKDIRWSLGDFGDIIMGTDMEGIGYSEVVENNLSIFGTGEKAQ  
gi|224926628|gb|ACN69876.1| RYNKDFCKDIRWSLGDFGDIIMGTDMEGIGYSKVVENNLSIFGTGEKAQ  
gi|224926630|gb|ACN69877.1| RYNKDFCKDIRWSLGDFGDIIMGTDMEGIGYSKVVENNLSIFGTGKNAQ  
gi|224926632|gb|ACN69878.1| RYNKDFCKDIRWSLGDFGDIIMGTDMEGIGYSKVVENNLSIFGTGEKAQ  
gi|224926634|gb|ACN69879.1| RYNKDFCKDIRWSLGDFGDIIMGTDMEGIGYSEVVENNLSIFGTGKNAQ  
gi|224926636|gb|ACN69880.1| RYNKDFCKDIRWSLGDFGDIIMGTDMEGIGYSEVVENNLSIFGTGEKAQ  
gi|224926638|gb|ACN69881.1| RYNKDFCKDIRWSLGDFGDIIMGTDMEGIGYSKVVENNLSIFGTGEKAQ  
gi|224926640|gb|ACN69882.1| RYNKDFCKDIRWSLGDFGDIIMGTDMEGIGYSEVVENNLSIFGTGKNAQ  
gi|224926642|gb|ACN69883.1| RYNKDFCKDIRWSLGDFGDIIMGTDMEGIGYSEVVENNLSIFGTGEKAQ  
gi|224926644|gb|ACN69884.1| RYNKDFCKDIRWSLGDFGDIIMGTDMEGIGYSEVVENNLSIFGTGEKAQ  
gi|224926646|gb|ACN69885.1| RYNKDFCKDIRWSLGDFGDIIMGTDMEGIGYSEVVENNLSIFGTGEKAQ  
gi|224926648|gb|ACN69886.1| RYNKDFCKDIRWSLGDFGDIIMGTDMEGIGYSKVVENNLSIFGTGEKAQ



|    |           |    |            |                      |                      |            |
|----|-----------|----|------------|----------------------|----------------------|------------|
| gi | 224926770 | gb | ACN69946.1 | RYNKDFCKDIRWSLGDFGDI | IMGTDMEGIGYSEVVENNLR | SIFGTGEQAQ |
| gi | 224926772 | gb | ACN69947.1 | RYNKDFCKDIRWSLGDFGDI | IMGTDMEGIGYSEVVENNLR | SIFGTGKNAQ |
| gi | 224926774 | gb | ACN69948.1 | RYNKDFCKDIRWSLGDFGDI | IMGTDMEGIGYSKVVENNLR | SIFGTDEKAQ |
| gi | 224926776 | gb | ACN69949.1 | RYNKDFCKDIRWSLGDFGDI | IMGTDMEGIGYSKVVENNLR | SIFGTGKNAQ |
| gi | 224926778 | gb | ACN69950.1 | RYNKDFCKDIRWSLGDFGDI | IMGTDMEGIGYSKVVENNLR | SIFGTGKNAQ |
| gi | 224926780 | gb | ACN69951.1 | RYNKDFCKDIRWSLGDFGDI | IMGTDMEGIGYSKVVENNLR | SIFGTGEKAQ |
| gi | 224926782 | gb | ACN69952.1 | RYNKDFCKDIRWSLGDFGDI | IMGTDMEGIGYSKVVENNLR | SIFGTGEKAQ |
| gi | 224926784 | gb | ACN69953.1 | RYNKDFCKDIRWSLGDFGDI | IMGTDMEGIRYSEVVENILR | SIFGTGEQAQ |
| gi | 224926786 | gb | ACN69954.1 | RYNKDFCKDIRWSLGDFGDI | IMGTDMEGIGYSKVVENNLR | SIFGTGEKAQ |
| gi | 224926788 | gb | ACN69955.1 | RYNKDFCKDIRWSLGDFGDI | IMGTDMEGIGYSKVVENNLR | SIFGTGEKAQ |
| gi | 224926790 | gb | ACN69956.1 | RYNKDFCKDIRWSLGDFGDI | IMGTDMEGIGYSKVVENNLR | SIFGTDEKAQ |
| gi | 224926792 | gb | ACN69957.1 | RYNKDFCKDIRWSLGDFGDI | IMGTDMEGIGYSKVVENNLR | SIFGTGEKAQ |
| gi | 224926794 | gb | ACN69958.1 | RYNKDFCKDIRWSLGDFGDI | IMGTDMEGIGYSKVVENNLR | SIFGTGEKAQ |
| gi | 224926796 | gb | ACN69959.1 | RYNKDFCKDIRWSLGDFGDI | IMGTDMEGIGYSKVVENNLR | SIFGTGEKAQ |
| gi | 224926798 | gb | ACN69960.1 | RYNKDFCKDIRWSLGDFGDI | IMGTDMEGIGYSKVVENNLR | SIFGTGEKAQ |
| gi | 224926800 | gb | ACN69961.1 | RYNKDFCKDIRWSLGDFGDI | IMGTDMEGIGYSKVVENNLR | SIFGTDEKAQ |
| gi | 224926802 | gb | ACN69962.1 | RYNKDFCKDIRWSLGDFGDI | IMGTDMEGIGYSEVVENNLR | SIFGTGKNAQ |
| gi | 224926804 | gb | ACN69963.1 | RYNKDFCKDIRWSLGDFGDI | IMGTDMEGIGYSEVVENNLR | SIFGTGKNAQ |
| gi | 224926806 | gb | ACN69964.1 | RYNKDFCKDIRWSLGDFGDI | IMGTDMEGIGYSKVVENNLR | SIFGTGEKAQ |
| gi | 224926808 | gb | ACN69965.1 | RYNKDFCKDIRWSLGDFGDI | IMGTDMEGIGYSKVVENNLR | SIFGTGKNAQ |
| gi | 224926810 | gb | ACN69966.1 | RYNKDFCKDIRWSLGDFGDI | IMGTDMEGIGYSEVVENNLR | SIFGTGKNAQ |
| gi | 224926812 | gb | ACN69967.1 | RYNKDFCKDIRWSLGDFGDI | IMGTDMEGIGYSEVVENNLR | SIFGTGKNAQ |
| gi | 224926814 | gb | ACN69968.1 | RYNKDFCKDIRWSLGDFGDI | IMGTDMEGIGYSKVVENNLR | SIFGTGEKAQ |
| gi | 224926816 | gb | ACN69969.1 | KYNKDFCKDIRWSLGDFGDI | IMGTDMEGIGYSKVVENNLR | SIFGTGEKAQ |
| gi | 224926818 | gb | ACN69970.1 | RYNKDFCKDIRWSLGDFGDI | IMGTDMEGIGYSKVVENNLR | SIFGTGEKAQ |
| gi | 224926820 | gb | ACN69971.1 | RYNKDFCKDIRWSLGDFGDI | IMGTDMEGIGYSKVVENNLR | SIFGTGEKAQ |
| gi | 213868281 | gb | ACJ54187.1 | RYNKDFCKDIRWSLGDFGDI | IMGTDMEGIGYSKVVENNLR | SIFGTGKNAQ |
| gi | 213868283 | gb | ACJ54188.1 | RYNKDFCKDIRWSLGDFGDI | IMGTDMEGIGYSKVVENNLR | SIFGTGKNAQ |
| gi | 213868285 | gb | ACJ54189.1 | RYNKDFCKDIRWSLGDFGDI | IMGTDMEGIGYSEVVENNLR | SIFGTGEKAQ |
| gi | 213868287 | gb | ACJ54190.1 | RYNKDFCKDIRWSLGDFGDI | IMGTDMEGIGYSEVVENNLR | SIFGTGEKAQ |
| gi | 213868289 | gb | ACJ54191.1 | RYNKDFCKDIRWSLGDFGDI | IMGTDMEGIGYSKVVENNLR | SIFGTDEKAQ |
| gi | 213868291 | gb | ACJ54192.1 | RYNKDFCKDIRWSLGDFGDI | IMGTDMEGIGYSKVVENNLR | SIFGTGEKAQ |
| gi | 213868293 | gb | ACJ54193.1 | RYNKDFCKDIRWSLGDFGDI | IMGTDMEGIGYSKVVENNLR | SIFGTDEKAQ |
| gi | 213868295 | gb | ACJ54194.1 | RYNKDFCKDIRWSLGDFGDI | IMGTDMEGIGYSKVVENNLR | SIFGTDEKAQ |
| gi | 213868297 | gb | ACJ54195.1 | RYNKDFCKDIRWSLGDFGDI | IMGTDMEGIGYSKVVENNLR | SIFGTDEKAQ |
| gi | 213868299 | gb | ACJ54196.1 | RYNKDFCKDIRWSLGDFGDI | IMGTDMEGIGYSKVVENNLR | SIFGTDEKAQ |
| gi | 213868301 | gb | ACJ54197.1 | RYNKDFCKDIRWSLGDFGDI | IMGTDMEGIGYSKVVENNLR | SIFGTGEKAQ |

:\*\*\*\*\* \*\*:\*: \*\*\*\*\*. : \*\*

|    |           |     |             |               |                        |                        |                 |
|----|-----------|-----|-------------|---------------|------------------------|------------------------|-----------------|
| gi | 11120233  | gb  | AAG30847.1  | QHRKQRWNESKAQ | IWTAMMYSVKKRLKGNFIWICK | INVAVNIEPQIYRWI        |                 |
| gi | 12407747  | gb  | AAG53634.1  | QHRKQWWNESKAQ | IWTAMMYSVKKRLKGNFIWICK | INVAVNIEPQIYRWI        |                 |
| gi | 18766659  | gb  | AAL79050.1  | AF46          | QRRKQWWNESKAQ          | IWTAMMYSVKKRLKGNFIWICK | LNVAVNIEPQIYRWI |
| gi | 18766819  | gb  | AAL79130.1  | AF46          | QHRKQWWNESKAQ          | IWTAMMYSVKKRLKGNFIWICK | INVAVNIEPQIYRWI |
| gi | 63146462  | gb  | AAAY34059.1 | QHRKQWWNESKAQ | IWTAMMYSVKKRLKGNFIWICK | INVAVNIEPQIYRWI        |                 |
| gi | 63146616  | gb  | AAAY34136.1 | QRRKQWWNESKAQ | IWTAMMYSVKKRLKGNFIWICK | LNVAVNIEPQIYRWI        |                 |
| gi | 11138983  | gb  | AAG31571.1  | QHRKQRWNESKAQ | IWTAMMYSVKKRLKGNFIWICK | INVAVNIEPQIYRWI        |                 |
| gi | 73697858  | gb  | AAZ81532.1  | QRRKQWWNESKAQ | IWTAMMYSVKKRLKGNFIWICK | LNVAVNIEPQIYRRI        |                 |
| gi | 73697846  | gb  | AAZ81526.1  | QHRKQWWNESKAQ | IWTAMMYSVKKRLKGNFIWICK | LNVAVNIEPQIYRWI        |                 |
| gi | 12004297  | gb  | AAG43989.1  | QHRKQWWNESKAQ | IWTAMMYSVKKRLKGNFIWICK | INVAVNIEPQIYRRI        |                 |
| gi | 12004299  | gb  | AAG43990.1  | QRRKQWWNESKAQ | IWTAMMYSVKKRLKGNFIWICK | INVAVNIEPQIYRRI        |                 |
| gi | 73697866  | gb  | AAZ81536.1  | QRHKQWWNESKAQ | IWTAMMYSVKKRLKGNFIWICK | INVAVNIEPQIYRRI        |                 |
| gi | 73697848  | gb  | AAZ81527.1  | QRRKQWWNESKAQ | IWTAMMYSVKKRLKGNFIWICK | LNVAVNIEPQIYRWI        |                 |
| gi | 73697856  | gb  | AAZ81531.1  | QHRKQWWNESKAQ | IWTAMMYSVKKRLKGNFIWICK | INVAVNIEPQIYRRI        |                 |
| gi | 73697862  | gb  | AAZ81534.1  | QHRKQWWNETKAQ | IWRAMMYSVKKRLKGNFIWICK | INVAVNIEPQIYRWI        |                 |
| gi | 160276    | gb  | AAA63423.1  | QRRKQWWNESKAQ | IWTAMMYSVKKRLKGNFIWICK | LNVAVNIEPQIYRWI        |                 |
| gi | 73697844  | gb  | AAZ81525.1  | QRRKQWWNESKAQ | IWTAMMYSVKKRLKGNFIWICK | LNVAVNIEPQIYRWI        |                 |
| gi | 339961368 | pdB | 3RRC        | A             | QRRKQWWNESKAQ          | IWTAMMYSVKKRLKGNFIWICK | LNVAVNIEPQIYRWI |
| gi | 339961369 | pdB | 3RRC        | B             | QRRKQWWNESKAQ          | IWTAMMYSVKKRLKGNFIWICK | LNVAVNIEPQIYRWI |
| gi | 255914751 | dbj | BAH96577.1  | QHRKQWWNESKAQ | IWTAMMYSVKKRLKGNFIWICK | INVAVNIEPQIYRWI        |                 |

|    |           |    |            |                                |                      |
|----|-----------|----|------------|--------------------------------|----------------------|
| gi | 224926624 | gb | ACN69874.1 | QRRKQWWNESKAQIWTAMMYSVKKRLKGF  | IWICKINAVNIEPQIYRRI  |
| gi | 224926626 | gb | ACN69875.1 | QRRKQWWNESKAQIWTAMMYSVKKRLKGF  | FMWICKINAVNIEPQIYRRI |
| gi | 224926628 | gb | ACN69876.1 | QHRKQWWNESKAQIWTAMMYSVKKRLKGNF | IWICKLNVAVNIEPQIYRWI |
| gi | 224926630 | gb | ACN69877.1 | QHRKQWWNETKAQIWRAMMYSVKKRLKGNF | IWICKINAVNIEPQIYRWI  |
| gi | 224926632 | gb | ACN69878.1 | QHRKQWWNESKAQIWTAMMYSVKKRLKGNF | IWICKLNVAVNIEPQIYRWI |
| gi | 224926634 | gb | ACN69879.1 | QRRKQWWNESKAQIWTAMMYSVKKRLKGF  | IWICKINAVNIEPQIYRRI  |
| gi | 224926636 | gb | ACN69880.1 | QRRKQWWNESKAQIWTAMMYSVKKRLKGF  | FMWICKINAVNIEPQIYRRI |
| gi | 224926638 | gb | ACN69881.1 | QHRKQWWNESKAQIWTAMMYSVKKRLKGNF | IWICKLNVAVNIEPQIYRWI |
| gi | 224926640 | gb | ACN69882.1 | QHRKQWWNESKAQIWTAMMYSVKKRLKGF  | IWICKINAVNIEPQIYRRI  |
| gi | 224926642 | gb | ACN69883.1 | QRRKQWWNESKAQIWTAMMYSVKKRLKGF  | FMWICKINAVNIEPQIYRRI |
| gi | 224926644 | gb | ACN69884.1 | QRRKQWWNESKAQIWTAMMYSVKKRLKGF  | FMWICKINAVNIEPQIYRRI |
| gi | 224926646 | gb | ACN69885.1 | QRRKQWWNESKAQIWTAMMYSVKKRLKGF  | IWICKINAVNIEPQIYRRI  |
| gi | 224926648 | gb | ACN69886.1 | QHRKQWWNESKAQIWTAMMYSVKKRLKGNF | IWICKLNVAVNIEPQIYRWI |
| gi | 224926650 | gb | ACN69887.1 | QRRKQWWNESKAQIWTAMMYSVKKRLKGF  | IWICKINAVNIEPQIYRRI  |
| gi | 224926652 | gb | ACN69888.1 | QRRKQWWNESKAQIWTAMMYSVKKRLKGF  | IWICKINAVNIEPQIYRRI  |
| gi | 224926654 | gb | ACN69889.1 | QRRKQWWNESKAQIWTAMMYSVKKRLKGF  | FMWICKINAVNIEPQIYRRI |
| gi | 224926656 | gb | ACN69890.1 | QHRKQWWNESKAQIWTAMMYSVKKRLKGNF | IWICKLNVAVNIEPQIYRWI |
| gi | 224926658 | gb | ACN69891.1 | QHRKQWWNESKAQIWTAMMYSVKKRLKGNF | IWICKLNVAVNIEPQIYRWI |
| gi | 224926660 | gb | ACN69892.1 | QHRKQWWNESKAQIWTAMMYSVKKRLKGF  | IWICKINAVNIEPQIYRRI  |
| gi | 224926662 | gb | ACN69893.1 | QHRKQWWNESKAQIWTAMMYSVKKRLKGNF | IWICKLNVAVNIEPQIYRWI |
| gi | 224926664 | gb | ACN69894.1 | QHRKQWWNETKAQIWRAMMYSVKKRLKGNF | IWICKINAVNIEPQIYRWI  |
| gi | 224926666 | gb | ACN69895.1 | QHRKQWWNESKAQIWTAMMYSVKKRLKGNF | IWICKLNVAVNIEPQIYRWI |
| gi | 224926668 | gb | ACN69896.1 | QRRKQWWNESKAQIWTAMMYSVKKRLKGF  | IWICKINAVNIEPQIYRRI  |
| gi | 224926670 | gb | ACN69897.1 | QHRKQWWNESKAQIWTAMMYSVKKRLKGNF | IWICKLNVAVNIEPQIYRWI |
| gi | 224926672 | gb | ACN69898.1 | QHRKQWWNESKAQIWTAMMYSVKKRLKGNF | IWICKLNVAVNIEPQIYRWI |
| gi | 224926674 | gb | ACN69899.1 | QHRKQWWNESKAQIWTAMMYSVKKRLKGF  | IWICKINAVNIEPQIYRRI  |
| gi | 224926676 | gb | ACN69900.1 | QHRKQWWNESKAQIWTAMMYSVKKRLKGF  | IWICKINAVNIEPQIYRRI  |
| gi | 224926678 | gb | ACN69901.1 | QHRKQWWNESKAQIWTAMMYSVKKRLKGNF | IWICKLNVAVNIEPQIYRWI |
| gi | 224926680 | gb | ACN69902.1 | QHRKQWWNETKAQIWRAMMYSVKKRLKGNF | IWICKINAVNIEPQIYRWI  |
| gi | 224926682 | gb | ACN69903.1 | QHRKQWWNESKAQIWTAMMYSVKKRLKGNF | IWICKLNVAVNIEPQIYRWI |
| gi | 224926684 | gb | ACN69904.1 | QRCKQWWNESKAQIWTAMMYSVKKRLKGNF | IWICKLNVAVNIEPQIYRWI |
| gi | 224926686 | gb | ACN69905.1 | QRRKQWWNESKAQIWTAMMYSVKKRLKGNF | IWICKLNVAVNIEPQIYRWI |
| gi | 224926688 | gb | ACN69906.1 | QHRKQWWNETKAQIWRAMMYSVKKRLKGNF | IWICKINAVNIEPQIYRWI  |
| gi | 224926690 | gb | ACN69907.1 | QHRKQWWNESKAQIWTAMMYSVKKRLKGF  | IWICKINAVNIEPQIYRRI  |
| gi | 224926692 | gb | ACN69908.1 | QRRKQWWNESKAQIWTAMMYSVKKRLKGNF | IWICKLNVAVNIEPQIYRWI |
| gi | 224926694 | gb | ACN69909.1 | QRCKQWWNEFKAQIWTAMMYSVKKRLKGF  | IWICKINAVNIEPQIYRRI  |
| gi | 224926696 | gb | ACN69910.1 | QRCKQWWNESKAQIWTAMMYSVKKRLKGF  | IWICKINAVNIEPQIYRRI  |
| gi | 224926698 | gb | ACN69911.1 | QHCKQWWNESKAQIWTAMMYSVKKRLKGNF | IWICKLNVAVNIEPQIYRWI |
| gi | 224926700 | gb | ACN69912.1 | QHCKQWWNESKAQIWTAMMYSVKKRLKGNF | IWICKLNVAVNIEPQIYRWI |
| gi | 224926702 | gb | ACN69913.1 | QHRKQWWNESKAQIWTAMMYSVKKRLKGF  | IWICKINAVNIEPQIYRRI  |
| gi | 224926704 | gb | ACN69914.1 | QHRKQWWNESKAQIWTAMMYSVKKRLKGNF | IWICKLNVAVNIEPQIYRWI |
| gi | 224926706 | gb | ACN69915.1 | QHRKQWWNESKAQIWTAMMYSVKKRLKGF  | FMWICKINAVNIEPQIYRRI |
| gi | 224926708 | gb | ACN69916.1 | QHRKQWWNESKAQIWTAMMYSVKKRLKGF  | IWICKINAVNIEPQIYRRI  |
| gi | 224926710 | gb | ACN69917.1 | QRRKQWWNESKAQIWTAMMYSVKKRLKGNF | IWICKLNVAVNIEPQIYRWI |
| gi | 224926714 | gb | ACN69918.1 | QRRKQWWNESKAQIWTAMMYSVKKRLKGNF | IWICKLNVAVNIEPQIYRWI |
| gi | 224926716 | gb | ACN69919.1 | QHRKQWWNESKAQIWTAMMYSVKKRLKGNF | IWICKLNVAVNIEPQIYRWI |
| gi | 224926718 | gb | ACN69920.1 | QRRKQWWNESKAQIWTAMMYSVKKRLKGNF | IWICKLNVAVNIEPQIYRWI |
| gi | 224926720 | gb | ACN69921.1 | QRRKQWWNESKAQIWTAMMYSVKKRLKGNF | IWICKLNVAVNIEPQIYRWI |
| gi | 224926722 | gb | ACN69922.1 | QHRKQWWNESKAQIWTAMMYSVKKRLKGNF | IWICKLNVAVNIEPQIYRWI |
| gi | 224926724 | gb | ACN69923.1 | QHRKQWWNESKAQIWTAMMYSVKKRLKGNF | IWICKLNVAVNIEPQIYRWI |
| gi | 224926726 | gb | ACN69924.1 | QHRKQWWNESKAQIWTAMMYSVKKRLKGF  | IWICKINAVNIEPQIYRRI  |
| gi | 224926728 | gb | ACN69925.1 | QHRKQWWNESKAQIWTAMMYSVKKRLKGNF | IWICKLNVAVNIEPQIYRWI |
| gi | 224926730 | gb | ACN69926.1 | QRRKQWWNESKAQIWTAMMYSVKKRLKGNF | IWICKLNVAVNIEPQIYRWI |
| gi | 224926732 | gb | ACN69927.1 | QHRKQWWNESKAQIWTAMMYSVKKRLKGF  | IWICKINAVNIEPQIYRRI  |
| gi | 224926734 | gb | ACN69928.1 | QHRKQWWNESKAQIWTAMMYSVKKRLKGNF | IWICKLNVAVNIEPQIYRWI |
| gi | 224926736 | gb | ACN69929.1 | QHRKQWWNESKAQIWTAMMYSVKKRLKGNF | IWICKINAVNIEPQIYRWI  |
| gi | 224926738 | gb | ACN69930.1 | QRRKQWWNESKAQIWTAMMYSVKKRLKGF  | IWICKINAVNIEPQIYRRI  |
| gi | 224926740 | gb | ACN69931.1 | QRRKQWWNESKAQIWTAMMYSVKKRLKGF  | IWICKLNVAVNIEPQIYRRI |
| gi | 224926742 | gb | ACN69932.1 | QRRKQWWNESKAQIWTAMMYSVKKRLKGNF | IWICKLNVAVNTEPQIYRWI |



|    |           |    |            |                                                    |
|----|-----------|----|------------|----------------------------------------------------|
| gi | 224926744 | gb | ACN69933.1 | QRRKQWWNESKAQIWTAMMYSVKKRLKGFWMWICKINAVNIEPQIYRRI  |
| gi | 224926746 | gb | ACN69934.1 | QHRKQWWNESKAQIWTAMMYSVKKRLKGNFIWICKLNVAVNIEPQIYRWI |
| gi | 224926748 | gb | ACN69935.1 | QHRKQWWNESKAQIWTAMMYSVKKRLKGNFIWICKLNVAVNIEPQIYRWI |
| gi | 224926750 | gb | ACN69936.1 | QHRKQWWNESKAQIWTAMMYSVKKRLKGNFIWICKLNVAVNIEPQIYRWI |
| gi | 224926752 | gb | ACN69937.1 | QHRKQWWNESKAQIWTAMMYSVKKRLKGNFIWICKLNVAVNIEPQIYRWI |
| gi | 224926754 | gb | ACN69938.1 | QHRKQWWNESKAQIWTAMMYSVKKRLKGFWMWICKINAVNIEPQIYRRI  |
| gi | 224926756 | gb | ACN69939.1 | QHRKQWWNESKAQIWTAMMYSVKKRLKGNFIWICKLNVAVNIEPQIYRWI |
| gi | 224926758 | gb | ACN69940.1 | QRCKQWWNEFKAQIWTAMMYSVKKRLKGFWMWICKINAVNIEPQIYRRI  |
| gi | 224926760 | gb | ACN69941.1 | QHRKQWWNESKAQIWTAMMYSVKKRLKGFWMWICKINAVNIEPQIYRRI  |
| gi | 224926762 | gb | ACN69942.1 | QHRKQWWNESKAQIWTAMMYSVKKRLKGFWMWICKINAVNIEPQIYRRI  |
| gi | 224926764 | gb | ACN69943.1 | QHRKQWWNESKAQIWTAMMYSVKKRLKGNFIWICKLNVAVNIEPQIYRWI |
| gi | 224926766 | gb | ACN69944.1 | QHRKQWWNESKAQIWTAMMYSVKKRLKGFWMWICKINAVNIEPQIYRRI  |
| gi | 224926768 | gb | ACN69945.1 | QRRKQWWNESKAQIWTAMMYSVKKRLKGNFIWICKLNVAVNIEPQIYRWI |
| gi | 224926770 | gb | ACN69946.1 | QRRKQWWNESKAQIWTAMMYSVKKRLKGFWMWICKINAVNIEPQIYRRI  |
| gi | 224926772 | gb | ACN69947.1 | QRRKQWWNESKAQIWTAMMYSVKKRLKGFWMWICKINAVNIEPQIYRRI  |
| gi | 224926774 | gb | ACN69948.1 | QRRKQWWNESKAQIWTAMMYSVKKRLKGNFIWICKLNVAVNIEPQIYRWI |
| gi | 224926776 | gb | ACN69949.1 | QHRKQWWNETKAQIWRAMMYSVKKRLKGNFIWICKINAVNIEPQIYRWI  |
| gi | 224926778 | gb | ACN69950.1 | QHRKQWWNETKAQIWRAMMYSVKKRLKGNFIWICKINAVNIEPQIYRWI  |
| gi | 224926780 | gb | ACN69951.1 | QHRKQWWNESKAQIWTAMMYSVKKRLKGNFIWICKLNVAVNIEPQIYRWI |
| gi | 224926782 | gb | ACN69952.1 | QHRKQWWNESKAQIWTAMMYSVKKRLKGNFIWICKLNVAVNIEPQIYRWI |
| gi | 224926784 | gb | ACN69953.1 | QRRKQWWNESKAQIWTAMMYSVKKRLKGFWMWICKINAVNIDPQIYRRF  |
| gi | 224926786 | gb | ACN69954.1 | QHRKQWWNESKAQIWTAMMYSVKKRLKGNFIWICKLNVAVNIEPQIYRWI |
| gi | 224926788 | gb | ACN69955.1 | QHRKQWWNESKAQIWTAMMYSVKKRLKGNFIWICKLNVAVNIEPQIYRWI |
| gi | 224926790 | gb | ACN69956.1 | QRRKQWWNESKAQIWTAMMYSVKKRLKGNFIWICKLNVAVNIEPQIYRWI |
| gi | 224926792 | gb | ACN69957.1 | QHRKQWWNESKAQIWTAMMYSVKKRLKGNFIWICKLNVAVNIEPQIYRWI |
| gi | 224926794 | gb | ACN69958.1 | QHRKQWWNESKAQIWTAMMYSVKKRLKGNFIWICKLNVAVNIEPQIYRWI |
| gi | 224926796 | gb | ACN69959.1 | QHRKQWWNESKAQIWTAMMYSVKKRLKGNFIWICKLNVAVNIEPQIYRWI |
| gi | 224926798 | gb | ACN69960.1 | QHRKQWWNESKAQIWTAMMYSVKKRLKGNFIWICKLNVAVNIEPQIYRWI |
| gi | 224926800 | gb | ACN69961.1 | QRRKQWWNESKAQIWTAMMYSVKKRLKGNFIWICKLNVAVNIEPQIYRWI |
| gi | 224926802 | gb | ACN69962.1 | QHRKQWWNESKAQIWTAMMYSVKKRLKGFWMWICKINAVNIEPQIYRRI  |
| gi | 224926804 | gb | ACN69963.1 | QRRKQWWNESKAQIWTAMMYSVKKRLKGFWMWICKINAVNIEPQIYRRI  |
| gi | 224926806 | gb | ACN69964.1 | QHRKQWWNESKAQIWTAMMYSVKKRLKGNFIWICKLNVAVNIEPQIYRWI |
| gi | 224926808 | gb | ACN69965.1 | QHRKQWWNETKAQIWRAMMYSVKKRLKGNFIWICKINAVNIEPQIYRWI  |
| gi | 224926810 | gb | ACN69966.1 | QRRKQWWNESKAQIWTAMMYSVKKRLKGFWMWICKINAVNIEPQIYRRI  |
| gi | 224926812 | gb | ACN69967.1 | QHRKQWWNESKAQIWTAMMYSVKKRLKGFWMWICKINAVNIEPQIYRRI  |
| gi | 224926814 | gb | ACN69968.1 | QHRKQWWNESKAQIWTAMMYSVKKRLKGNFIWICKLNVAVNIEPQIYRWI |
| gi | 224926816 | gb | ACN69969.1 | QHRKQWWNESKAQIWTAMMYSVKKRLKGNFIWICKLNVAVNIEPQIYRWI |
| gi | 224926818 | gb | ACN69970.1 | QHRKQWWNESKAQIWTAMMYSVKKRLKGNFIWICKLNVAVNIEPQIYRWI |
| gi | 224926820 | gb | ACN69971.1 | QHRKQWWNESKAQIWTAMMYSVKKRLKGNFIWICKLNVAVNIEPQIYRWI |
| gi | 213868281 | gb | ACJ54187.1 | QHRKQWWNETKAQIWRAMMYSVKKRLKGNFIWICKINAVNIEPQIYRWI  |
| gi | 213868283 | gb | ACJ54188.1 | QHRKQWWNETKAQIWRAMMYSVKKRLKGNFIWICKINAVNIEPQIYRWI  |
| gi | 213868285 | gb | ACJ54189.1 | QRRKQWWNESKAQIWTAMMYSVKKRLKGFWMWICKINAVNIEPQIYRRI  |
| gi | 213868287 | gb | ACJ54190.1 | QRRKQWWNESKAQIWTAMMYSVKKRLKGFWMWICKINAVNIEPQIYRRI  |
| gi | 213868289 | gb | ACJ54191.1 | QRRKQWWNESKAQIWTAMMYSVKKRLKGFWMWICKINAVNIEPQIYRRI  |
| gi | 213868291 | gb | ACJ54192.1 | QHRKQWWNESKAQIWTAMMYSVKKRLKGNFIWICKLNVAVNIEPQIYRWI |
| gi | 213868293 | gb | ACJ54193.1 | QRRKQWWNESKAQIWTAMMYSVKKRLKGNFIWICKLNVAVNIEPQIYRWI |
| gi | 213868295 | gb | ACJ54194.1 | QRRKQWWNESKAQIWTAMMYSVKKRLKGNFIWICKLNVAVNIEPQIYRRI |
| gi | 213868297 | gb | ACJ54195.1 | QRRKQWWNESKAQIWTAMMYSVKKRLKGNFIWICKLNVAVNIEPQIYRWI |
| gi | 213868299 | gb | ACJ54196.1 | QRRKQWWNESKAQIWTAMMYSVKKRLKGFWMWICKINAVNIEPQIYRRI  |
| gi | 213868301 | gb | ACJ54197.1 | QHRKQWWNESKAQIWTAMMYSVKKRLKGNFIWICKLNVAVNIEPQIYRWI |

\*: \*\* \*\*\* \*\*\*\*\* :\*:\*\*\*\*:\*\*\*\*\* :\*\*\*\*\* :

|    |          |    |             |                                                          |
|----|----------|----|-------------|----------------------------------------------------------|
| gi | 11120233 | gb | AAG30847.1  | REWGRDYVKELPTEVQKLKEKCDGKINYTDKKVCKV-PPCQNACKSYDQW       |
| gi | 12407747 | gb | AAG53634.1  | REWGRDYVKELPTEVQKLKEKCDGKINYDPDKVCKV-PPCQNACKSYDQW       |
| gi | 18766659 | gb | AAL79050.1  | AF46 REWGRDYVSELPTVEVQKLKEKCDGKINYTDKKVCKV-PPCQNACKSYDQW |
| gi | 18766819 | gb | AAL79130.1  | AF46 REWGRDYVKELPTEVQKLKEKCDGKINYTDKKVCKV-PPCQNACKSYDQW  |
| gi | 63146462 | gb | AAAY34059.1 | REWGRDYVKELPTEVQKLKEKCDGKINYTDKKVCKV-PPCQNACKSYDQW       |
| gi | 63146616 | gb | AAAY34136.1 | REWGRDYVSELPTVEVQKLKEKCDGKINYTDKKVCKV-PPCQNACKSYDQW      |
| gi | 11138983 | gb | AAG31571.1  | REWGRDYVKELPTEVQKLKEKCDGKINYTDKKVCKV-PPCQNACKSYDQW       |





|    |           |    |            |                                                                                           |
|----|-----------|----|------------|-------------------------------------------------------------------------------------------|
| gi | 213868295 | gb | ACJ54194.1 | REWGRDYVSELPTDEVQKLKEKCDGKINYTDKKVCKV-PPCQNACKSYDQW                                       |
| gi | 213868297 | gb | ACJ54195.1 | REWGRDYVSELPTDEVQKLKEKCDGKINYTDKKVCKV-PPCQNACKSYDQW                                       |
| gi | 213868299 | gb | ACJ54196.1 | REWGRDYVSELPTDEVQKLKEKCDGKINYTDKKVCKV-PPCQNACKSYDQW                                       |
| gi | 213868301 | gb | ACJ54197.1 | REWGRDYVSELPTDEVQKLKEKCDGKINYTDKKVCKV-PPCQNACKSYDEW<br>***** . *****: ** . ***** *****: * |

|    |           |     |            |                                                    |
|----|-----------|-----|------------|----------------------------------------------------|
| gi | 11120233  | gb  | AAG30847.1 | ITRKKNQWDVLSNKFISVKNAEKVQTAGIVTPYDILKQELDEFNEVAFEN |
| gi | 12407747  | gb  | AAG53634.1 | ITRKKNQWDVLSNKFISVKNAEKVQTAGIVTPYDILKQELDEFNEVAFEN |
| gi | 18766659  | gb  | AAL79050.1 | ITRKKNQWDVLSNKFISVKNAEKVQTAGIVTPYD-----            |
| gi | 18766819  | gb  | AAL79130.1 | ITRKKNQWDVLSNKFISVKNAEKVQTAGIVTPYD-----            |
| gi | 63146462  | gb  | AAZ34059.1 | ITRKKNQWDVLSNKFISVKNAEKVQTAGIVTPYD-----            |
| gi | 63146616  | gb  | AAZ34136.1 | ITRKKNQWDVLSNKFISVKNAEKVQTAGIVTP-----              |
| gi | 11138983  | gb  | AAG31571.1 | ITRKKNQWDVLSNKFISVKNAEKVQTAGIVTPYDILKQELDEFNEVAFEN |
| gi | 73697858  | gb  | AAZ81532.1 | ITRKKNQWDVLSNKFISVKNAEKVQTAGIVTPYDILKQELDEFNEVAFEN |
| gi | 73697846  | gb  | AAZ81526.1 | ITRKKNQWDVLSNKFISVKNAEKVQTAGIVTPYDILKQELDEFNEVAFEN |
| gi | 12004297  | gb  | AAG43989.1 | ITRKKNQWDVLSNKFISVKNAEKVQTAGIVTPYDILKQELDEFNEVAFEN |
| gi | 12004299  | gb  | AAG43990.1 | ITRKKNQWDVLSNKFISVKNAEKVQTAGIVTPYDILKQELDEFNEVAFEN |
| gi | 73697866  | gb  | AAZ81536.1 | ITRKKNQWDVLSNKFISVKNAEKVQTAGIVTPYDILKQELDEFNEVAFEN |
| gi | 73697848  | gb  | AAZ81527.1 | ITRKKNQWDVLSNKFISVKNAEKVQTAGIVTPYDILKQELDEFNEVAFEN |
| gi | 73697856  | gb  | AAZ81531.1 | ITRKKNQWDVLSNKFISVKNAEKVQTAGIVTPYDILKQELDEFNEVAFEN |
| gi | 73697862  | gb  | AAZ81534.1 | ITRKKNQWDVLSNKFISVKNAEKVQTAGIVTPYDILKQELDEFNEVAFEN |
| gi | 160276    | gb  | AAA63423.1 | ITRKKNQWDVLSNKFISVKNAEKVQTAGIVTPYDILKQELDEFNEVAFEN |
| gi | 73697844  | gb  | AAZ81525.1 | ITRKKNQWDVLSNKFISVKNAEKVQTAGIVTPYDILKQELDEFNEVAFEN |
| gi | 339961368 | pdb | 3RRC A     | ITRKKNQWDVLSNKFISVKNAEKVQTAGIVTPYDILKQELDEFNEVAFEN |
| gi | 339961369 | pdb | 3RRC B     | ITRKKNQWDVLSNKFISVKNAEKVQTAGIVTPYDILKQELDEFNEVAFEN |
| gi | 255914751 | dbj | BAH96577.1 | ITRKKNQWDVLSNKFISVKNAEKVQTAGIVTPYDILKQELDEFNEVAFEN |
| gi | 224926624 | gb  | ACN69874.1 | ITRKKNQWDVLSNKFISVKNAEKVQTAGIVTPYDILKQELDEFNEVAFEN |
| gi | 224926626 | gb  | ACN69875.1 | ITRKKNQWDVLSNKFISVKNAEKVQTAGIVTPYDILKQELDEFNEVAFEN |
| gi | 224926628 | gb  | ACN69876.1 | ITRKKNQWDVLSNKFISVKNAEKVQTAGIVTPYDILKQELDEFNEVAFEN |
| gi | 224926630 | gb  | ACN69877.1 | ITRKKNQWDVLSNKFISVKNAEKVQTAGIVTPYDILKQELDEFNEVAFEN |
| gi | 224926632 | gb  | ACN69878.1 | ITRKKNQWDVLSNKFISVKNAEKVQTAGIVTPYDILKQELDEFNEVAFEN |
| gi | 224926634 | gb  | ACN69879.1 | ITRKKNQWDVLSNKFISVKNAEKVQTAGIVTPYDILKQELDEFNEVAFEN |
| gi | 224926636 | gb  | ACN69880.1 | ITRKKNQWDVLSNKFISVKNAEKVQTAGIVTPYDILKQELDEFNEVAFEN |
| gi | 224926638 | gb  | ACN69881.1 | ITRKKNQWDVLSNKFISVKNAEKVQTAGIVTPYDILKQELDEFNEVAFEN |
| gi | 224926640 | gb  | ACN69882.1 | ITRKKNQWDVLSNKFISVKNAEKVQTAGIVTPYDILKQELDEFNEVAFEN |
| gi | 224926642 | gb  | ACN69883.1 | ITRKKNQWDVLSNKFISVKNAEKVQTAGIVTPYDILKQELDEFNEVAFEN |
| gi | 224926644 | gb  | ACN69884.1 | ITRKKNQWDVLSNKFISVKNAEKVQTAGIVTPYDILKQELDEFNEVAFEN |
| gi | 224926646 | gb  | ACN69885.1 | ITRKKNQWDVLSNKFISVKNAEKVQTAGIVTPYDILKQELDEFNEVAFEN |
| gi | 224926648 | gb  | ACN69886.1 | ITRKKNQWDVLSNKFISVKNAEKVQTAGIVTPYDILKQELDEFNEVAFEN |
| gi | 224926650 | gb  | ACN69887.1 | ITRKKNQWDVLSNKFISVKNAEKVQTAGIVTPYDILKQELDEFNEVAFEN |
| gi | 224926652 | gb  | ACN69888.1 | ITRKKNQWDVLSNKFISVKNAEKVQTAGIVTPYDILKQELDEFNEVAFEN |
| gi | 224926654 | gb  | ACN69889.1 | ITRKKNQWDVLSNKFISVKNAEKVQTAGIVTPYDILKQELDEFNEVAFEN |
| gi | 224926656 | gb  | ACN69890.1 | ITRKKNQWDVLSNKFISVKNAEKVQTAGIVTPYDILKQELDEFNEVAFEN |
| gi | 224926658 | gb  | ACN69891.1 | ITRKKNQWDVLSNKFISVKNAEKVQTAGIVTPYDILKQELDEFNEVAFEN |
| gi | 224926660 | gb  | ACN69892.1 | ITRKKNQWDVLSNKFISVKNAEKVQTAGIVTPYDILKQELDEFNEVAFEN |
| gi | 224926662 | gb  | ACN69893.1 | ITRKKNQWDVLSNKFISVKNAEKVQTAGIVTPYDILKQELDEFNEVAFEN |
| gi | 224926664 | gb  | ACN69894.1 | ITRKKNQWDVLSNKFISVKNAEKVQTAGIVTPYDILKQELDEFNEVAFEN |
| gi | 224926666 | gb  | ACN69895.1 | ITRKKNQWDVLSNKFISVKNAEKVQTAGIVTPYDILKQELDEFNEVAFEN |
| gi | 224926668 | gb  | ACN69896.1 | ITRKKNQWDVLSNKFISVKNAEKVQTAGIVTPYDILKQELDEFNEVAFEN |
| gi | 224926670 | gb  | ACN69897.1 | ITRKKNQWDVLSNKFISVKNAEKVQTAGIVTPYDILKQELDEFNEVAFEN |
| gi | 224926672 | gb  | ACN69898.1 | ITRKKNQWDVLSNKFISVKNAEKVQTAGIVTPYDILKQELDEFNEVAFEN |
| gi | 224926674 | gb  | ACN69899.1 | ITRKKNQWDVLSNKFISVKNAEKVQTAGIVTPYDILKQELDEFNEVAFEN |
| gi | 224926676 | gb  | ACN69900.1 | ITRKKNQWDVLSNKFISVKNAEKVQTAGIVTPYDILKQELDEFNEVAFEN |
| gi | 224926678 | gb  | ACN69901.1 | ITRKKNQWDVLSNKFISVKNAEKVQTAGIVTPYDILKQELDEFNEVAFEN |
| gi | 224926680 | gb  | ACN69902.1 | ITRKKNQWDVLSNKFISVKNAEKVQTAGIVTPYDILKQELDEFNEVAFEN |
| gi | 224926682 | gb  | ACN69903.1 | ITRKKNQWDVLSNKFISVKNAEKVQTAGIVTPYDILKQELDEFNEVAFEN |
| gi | 224926684 | gb  | ACN69904.1 | ITRKKNQWDVLSNKFISVKNAEKVQTAGIVTPYDILKQELDEFNEVAFEN |
| gi | 224926686 | gb  | ACN69905.1 | ITRKKNQWDVLSNKFISVKNAEKVQTAGIVTPYDILKQELDEFNEVAFEN |
| gi | 224926688 | gb  | ACN69906.1 | ITRKKNQWDVLSNKFISVKNAEKVQTAGIVTPYDILKQELDEFNEVAFEN |



|    |           |    |            |  |                                                    |
|----|-----------|----|------------|--|----------------------------------------------------|
| gi | 224926810 | gb | ACN69966.1 |  | ITRKKNQWDVLSNKFISVKNAEKVQTAGIVTPYDILKQELDEFNEVAFEN |
| gi | 224926812 | gb | ACN69967.1 |  | ITRKKNQWDVLSNKFISVKNAEKVQTAGIVTPYDILKQELDEFNEVAFEN |
| gi | 224926814 | gb | ACN69968.1 |  | ITRKKNQWDVLSNKFISVKNAEKVQTAGIVTPYDILKQELDEFNEVAFEN |
| gi | 224926816 | gb | ACN69969.1 |  | ITRKKNQWDVLSNKFISVKNAEKVQTAGIVTPYDILKQELDEFNEVAFEN |
| gi | 224926818 | gb | ACN69970.1 |  | ITRKKNQWDVLSNKFISVKNAEKVQTAGIVTPYDILKQELDEFNEVAFEN |
| gi | 224926820 | gb | ACN69971.1 |  | ITRKKNQWDVLSNKFISVKNAEKVQTAGIVTPYDILKQELDEFNEVAFEN |
| gi | 213868281 | gb | ACJ54187.1 |  | ITRKKNQWDVLSNKFISVKNAEKVQTAGIVTPYDILKQELDEFNEVAFEN |
| gi | 213868283 | gb | ACJ54188.1 |  | ITRKKNQWDVLSNKFISVKNAEKVQTAGIVTPYDILKQELDEFNEVAFEN |
| gi | 213868285 | gb | ACJ54189.1 |  | ITRKKNQWDVLSNKFISVKNAEKVQTAGIVTPYDILKQELDEFNEVAFEN |
| gi | 213868287 | gb | ACJ54190.1 |  | ITRKKNQWDVLSNKFISVKNAEKVQTAGIVTPYDILKQELDEFNEVAFEN |
| gi | 213868289 | gb | ACJ54191.1 |  | ITRKKNQWDVLSNKFISVKNAEKVQTAGIVTPYDILKQELDEFNEVAFEN |
| gi | 213868291 | gb | ACJ54192.1 |  | ITRKKNQWDVLSNKFISVKNAEKVQTAGIVTPYDILKQELDEFNEVAFEN |
| gi | 213868293 | gb | ACJ54193.1 |  | ITRKKNQWDVLSNKFISVKNAEKVQTAGIVTPYDILKQELDEFNEVAFEN |
| gi | 213868295 | gb | ACJ54194.1 |  | ITRKKNQWDVLSNKFISVKNAEKVQTAGIVTPYDILKQELDEFNEVAFEN |
| gi | 213868297 | gb | ACJ54195.1 |  | ITRKKNQWDVLSNKFISVKNAEKVQTAGIVTPYDILKQELDEFNEVAFEN |
| gi | 213868299 | gb | ACJ54196.1 |  | ITRKKNQWDVLSNKFISVKNAEKVQTAGIVTPYDILKQELDEFNEVAFEN |
| gi | 213868301 | gb | ACJ54197.1 |  | ITRKKNQWDVLSNKFISVKNAEKVQTAGIVTPYDILKQELDEFNEVAFEN |

:\*\*\*\*\*

|    |           |     |            |      |                               |
|----|-----------|-----|------------|------|-------------------------------|
| gi | 11120233  | gb  | AAG30847.1 |      | EINKRDGAYIELCVCSVEEAKKNTQEVVT |
| gi | 12407747  | gb  | AAG53634.1 |      | EINKRDGAYIELCVCSVEEAKKNTQEVVT |
| gi | 18766659  | gb  | AAL79050.1 | AF46 | -----                         |
| gi | 18766819  | gb  | AAL79130.1 | AF46 | -----                         |
| gi | 63146462  | gb  | AAZ34059.1 |      | -----                         |
| gi | 63146616  | gb  | AAZ34136.1 |      | -----                         |
| gi | 11138983  | gb  | AAG31571.1 |      | EINKRDGAYIELCVCSVEEAKKNTQEVVT |
| gi | 73697858  | gb  | AAZ81532.1 |      | EINKRDGAYIELCVCSVEEAKKNTQEVVT |
| gi | 73697846  | gb  | AAZ81526.1 |      | EINKRDGAYIELCVCSVEEAKKNTQEVVT |
| gi | 12004297  | gb  | AAG43989.1 |      | EINKRDGAYIELCVCSVEEAKKNTQEVVT |
| gi | 12004299  | gb  | AAG43990.1 |      | EINKRDGAYIELCVCSVEEAKKNTQEVVT |
| gi | 73697866  | gb  | AAZ81536.1 |      | EINKRDGAYIELCVCSVEEAKKNTQEVVT |
| gi | 73697848  | gb  | AAZ81527.1 |      | EINKRDGAYIELCVCSVEEAKKNTQEVVT |
| gi | 73697856  | gb  | AAZ81531.1 |      | EINKRDGAYIELCVCSVEEAKKNTQEVVT |
| gi | 73697862  | gb  | AAZ81534.1 |      | EINKRDGAYIELCVCSVEEAKKNTQEVVT |
| gi | 160276    | gb  | AAA63423.1 |      | EINKRDGAYIELCVCSVEEAKKNTQEVVT |
| gi | 73697844  | gb  | AAZ81525.1 |      | EINKRDGAYIELCVCSVEEAKKNTQEVVT |
| gi | 339961368 | pdb | 3RRC       | A    | EINKRDGAYIELCVCSVEEAKKNTQEVVT |
| gi | 339961369 | pdb | 3RRC       | B    | EINKRDGAYIELCVCSVEEAKKNTQEVVT |
| gi | 255914751 | dbj | BAH96577.1 |      | EINKRDGAYIELCVCSVEEAKKNTQEVVT |
| gi | 224926624 | gb  | ACN69874.1 |      | EINKRDGAYIELCV-----           |
| gi | 224926626 | gb  | ACN69875.1 |      | EINKRDGAYIELCV-----           |
| gi | 224926628 | gb  | ACN69876.1 |      | EINKRDGAYIELCV-----           |
| gi | 224926630 | gb  | ACN69877.1 |      | EINKRDGAYIELCV-----           |
| gi | 224926632 | gb  | ACN69878.1 |      | EINKRDGAYIELCV-----           |
| gi | 224926634 | gb  | ACN69879.1 |      | EINKRDGAYIELCV-----           |
| gi | 224926636 | gb  | ACN69880.1 |      | EINKRDGAYIELCV-----           |
| gi | 224926638 | gb  | ACN69881.1 |      | EINKRDGAYIELCV-----           |
| gi | 224926640 | gb  | ACN69882.1 |      | EINKRDGAYIELCV-----           |
| gi | 224926642 | gb  | ACN69883.1 |      | EINKRDGAYIELCV-----           |
| gi | 224926644 | gb  | ACN69884.1 |      | EINKRDGAYIELCV-----           |
| gi | 224926646 | gb  | ACN69885.1 |      | EINKRDGAYIELCV-----           |
| gi | 224926648 | gb  | ACN69886.1 |      | EINKRDGAYIELCV-----           |
| gi | 224926650 | gb  | ACN69887.1 |      | EINKRDGAYIELCV-----           |
| gi | 224926652 | gb  | ACN69888.1 |      | EINKRDGAYIELCV-----           |
| gi | 224926654 | gb  | ACN69889.1 |      | EINKRDGAYIELCV-----           |
| gi | 224926656 | gb  | ACN69890.1 |      | EINKRDGAYIELCV-----           |
| gi | 224926658 | gb  | ACN69891.1 |      | EINKRDGAYIELCV-----           |
| gi | 224926660 | gb  | ACN69892.1 |      | EINKRDGAYIELCV-----           |
| gi | 224926662 | gb  | ACN69893.1 |      | EINKRDGAYIELCV-----           |

|    |           |    |            |                     |
|----|-----------|----|------------|---------------------|
| gi | 224926664 | gb | ACN69894.1 | EINKRDGAYIELCV----- |
| gi | 224926666 | gb | ACN69895.1 | EINKRDGAYIELCV----- |
| gi | 224926668 | gb | ACN69896.1 | EINKRDGAYIELCV----- |
| gi | 224926670 | gb | ACN69897.1 | EINKRDGAYIELCV----- |
| gi | 224926672 | gb | ACN69898.1 | EINKRDGAYIELCV----- |
| gi | 224926674 | gb | ACN69899.1 | EINKRDGAYIELCV----- |
| gi | 224926676 | gb | ACN69900.1 | EINKRDGAYIELCV----- |
| gi | 224926678 | gb | ACN69901.1 | EINKRDGAYIELCV----- |
| gi | 224926680 | gb | ACN69902.1 | EINKRDGAYIELCV----- |
| gi | 224926682 | gb | ACN69903.1 | EINKRDGAYIELCV----- |
| gi | 224926684 | gb | ACN69904.1 | EINKRDGAYIELCV----- |
| gi | 224926686 | gb | ACN69905.1 | EINKRDGAYIELCV----- |
| gi | 224926688 | gb | ACN69906.1 | EINKRDGAYIELCV----- |
| gi | 224926690 | gb | ACN69907.1 | EINKRDGAYIELCV----- |
| gi | 224926692 | gb | ACN69908.1 | EINKRDGAYIELCV----- |
| gi | 224926694 | gb | ACN69909.1 | EINKRDGAYIELCV----- |
| gi | 224926696 | gb | ACN69910.1 | EINKRDGAYIELCV----- |
| gi | 224926698 | gb | ACN69911.1 | EINKRDGAYIELCV----- |
| gi | 224926700 | gb | ACN69912.1 | EINKRDGAYIELCV----- |
| gi | 224926702 | gb | ACN69913.1 | EINKRDGAYIELCV----- |
| gi | 224926704 | gb | ACN69914.1 | EINKRDGAYIELCV----- |
| gi | 224926706 | gb | ACN69915.1 | EINKRDGAYIELCV----- |
| gi | 224926708 | gb | ACN69916.1 | EINKRDGAYIELCV----- |
| gi | 224926710 | gb | ACN69917.1 | EINKRDGAYIELCV----- |
| gi | 224926714 | gb | ACN69918.1 | EINKRDGAYIELCV----- |
| gi | 224926716 | gb | ACN69919.1 | EINKRDGAYIELCV----- |
| gi | 224926718 | gb | ACN69920.1 | EINKRDGAYIELCV----- |
| gi | 224926720 | gb | ACN69921.1 | EINKRDGAYIELCV----- |
| gi | 224926722 | gb | ACN69922.1 | EINKRDGAYIELCV----- |
| gi | 224926724 | gb | ACN69923.1 | EINKRDGAYIELCV----- |
| gi | 224926726 | gb | ACN69924.1 | EINKRDGAYIELCV----- |
| gi | 224926728 | gb | ACN69925.1 | EINKRDGAYIELCV----- |
| gi | 224926730 | gb | ACN69926.1 | EINKRDGAYIELCV----- |
| gi | 224926732 | gb | ACN69927.1 | EINKRDGAYIELCV----- |
| gi | 224926734 | gb | ACN69928.1 | EINKRDGAYIELCV----- |
| gi | 224926736 | gb | ACN69929.1 | EINKRDGAYIELCV----- |
| gi | 224926738 | gb | ACN69930.1 | EINKRDGAYIELCV----- |
| gi | 224926740 | gb | ACN69931.1 | EINKRDGAYIELCV----- |
| gi | 224926742 | gb | ACN69932.1 | EINKRDGAYIELCV----- |
| gi | 224926744 | gb | ACN69933.1 | EINKRDGAYIELCV----- |
| gi | 224926746 | gb | ACN69934.1 | EINKRDGAYIELCV----- |
| gi | 224926748 | gb | ACN69935.1 | EINKRDGAYIELCV----- |
| gi | 224926750 | gb | ACN69936.1 | EINKRDGAYIELCV----- |
| gi | 224926752 | gb | ACN69937.1 | EINKRDGAYIELCV----- |
| gi | 224926754 | gb | ACN69938.1 | EINKRDGAYIELCV----- |
| gi | 224926756 | gb | ACN69939.1 | EINKRDGAYIELCV----- |
| gi | 224926758 | gb | ACN69940.1 | EINKRDGAYIELCV----- |
| gi | 224926760 | gb | ACN69941.1 | EINKRDGAYIELCV----- |
| gi | 224926762 | gb | ACN69942.1 | EINKRDGAYIELCV----- |
| gi | 224926764 | gb | ACN69943.1 | EINKRDGAYIELCV----- |
| gi | 224926766 | gb | ACN69944.1 | EINKRDGAYIELCV----- |
| gi | 224926768 | gb | ACN69945.1 | EINKRDGAYIELCV----- |
| gi | 224926770 | gb | ACN69946.1 | EINKRDGAYIELCV----- |
| gi | 224926772 | gb | ACN69947.1 | EINKRDGAYIELCV----- |
| gi | 224926774 | gb | ACN69948.1 | EINKRDGAYIELCV----- |
| gi | 224926776 | gb | ACN69949.1 | EINKRDGAYIELCV----- |
| gi | 224926778 | gb | ACN69950.1 | EINKRDGAYIELCV----- |
| gi | 224926780 | gb | ACN69951.1 | EINKRDGAYIELCV----- |
| gi | 224926782 | gb | ACN69952.1 | EINKRDGAYIELCV----- |

|    |           |    |            |                               |
|----|-----------|----|------------|-------------------------------|
| gi | 224926784 | gb | ACN69953.1 | EINKRDGAYIELCV-----           |
| gi | 224926786 | gb | ACN69954.1 | EINKRDGAYIELCV-----           |
| gi | 224926788 | gb | ACN69955.1 | EINKRDGAYIELCV-----           |
| gi | 224926790 | gb | ACN69956.1 | EINKRDGAYIELCV-----           |
| gi | 224926792 | gb | ACN69957.1 | EINKRDGAYIELCV-----           |
| gi | 224926794 | gb | ACN69958.1 | EINKRDGAYIELCV-----           |
| gi | 224926796 | gb | ACN69959.1 | EINKRDGAYIELCV-----           |
| gi | 224926798 | gb | ACN69960.1 | EINKRDGAYSELCV-----           |
| gi | 224926800 | gb | ACN69961.1 | EINKRDGAYIELCV-----           |
| gi | 224926802 | gb | ACN69962.1 | EINKRDGAYIELCV-----           |
| gi | 224926804 | gb | ACN69963.1 | EINKRDGAYIELCV-----           |
| gi | 224926806 | gb | ACN69964.1 | EINKRDGAYIELCV-----           |
| gi | 224926808 | gb | ACN69965.1 | EINKRDGAYIELCV-----           |
| gi | 224926810 | gb | ACN69966.1 | EINKRDGAYIELCV-----           |
| gi | 224926812 | gb | ACN69967.1 | EINKRDGAYIELCV-----           |
| gi | 224926814 | gb | ACN69968.1 | EINKRDGAYIELCV-----           |
| gi | 224926816 | gb | ACN69969.1 | EINKRDGAYIELCV-----           |
| gi | 224926818 | gb | ACN69970.1 | EINKRDGAYIELCV-----           |
| gi | 224926820 | gb | ACN69971.1 | EINKRDGAYIELCV-----           |
| gi | 213868281 | gb | ACJ54187.1 | EINKRDGAYIELCVCSVEEAKKNTQEVVT |
| gi | 213868283 | gb | ACJ54188.1 | EINKRDGAYIELCVCSVEEAKKNTQEVVT |
| gi | 213868285 | gb | ACJ54189.1 | EINKRDGAYIELCVCSVEEAKKNTQEVVT |
| gi | 213868287 | gb | ACJ54190.1 | EINKRDGAYIELCVCSVEEAKKNTQEVVT |
| gi | 213868289 | gb | ACJ54191.1 | EINKRDGAYIELCVCSVEEAKKNTQEVVT |
| gi | 213868291 | gb | ACJ54192.1 | EINKRDGAYIELCVCSVEEAKKNTQEVVT |
| gi | 213868293 | gb | ACJ54193.1 | EINKRDGAYIELCVCSVEEAKKNTQEVVT |
| gi | 213868295 | gb | ACJ54194.1 | EINKRDGAYIELCVCSVEEAKKNTQEVVT |
| gi | 213868297 | gb | ACJ54195.1 | EINKRDGAYIELCVCSVEEAKKNTQEVVT |
| gi | 213868299 | gb | ACJ54196.1 | EINKRDGAYIELCVCSVEEAKKNTQEVVT |
| gi | 213868301 | gb | ACJ54197.1 | EINKRDGAYIELCVCSVEEAKKNTQEVVT |
