# Supplementary material for: Glycan Masking of Plasmodium vivax Duffy Binding Protein for Probing Protein Binding Function and Vaccine Development
Source: PubMed Central journal article supplement (PMC3681752; doi:10.1371/journal.ppat.1003420), 2013-06-13

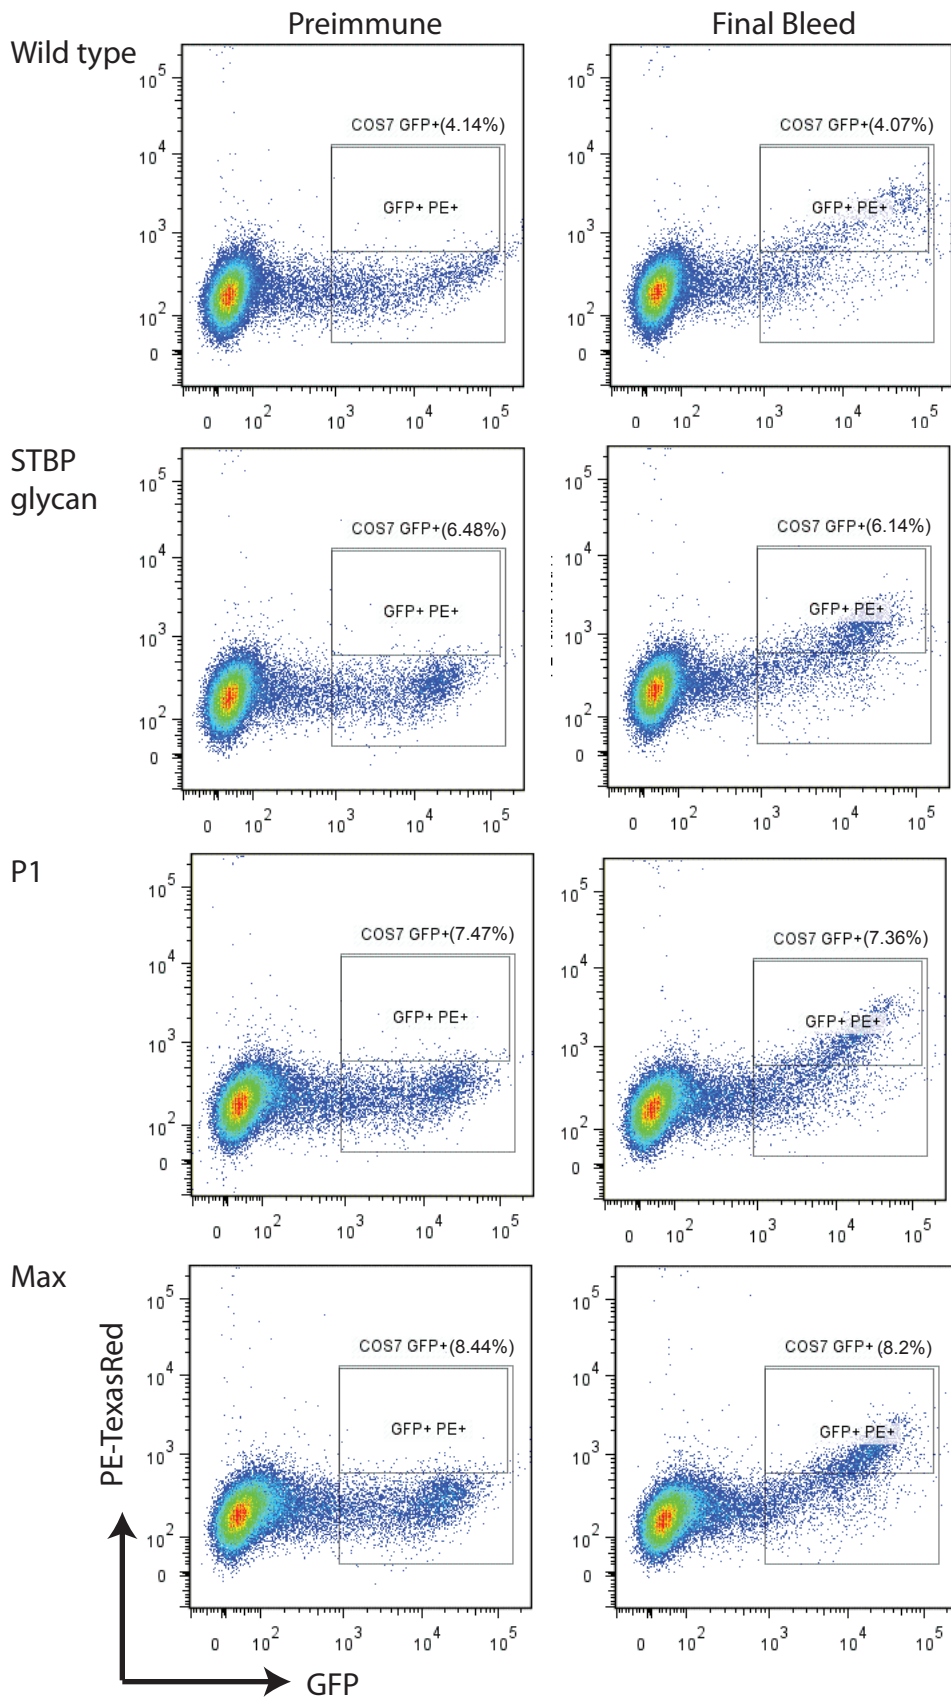

Supplement: ppat.1003420.s003.pdf [file ppat.1003420.s003.pdf]
