# Supplementary material for: Glycan Masking of Plasmodium vivax Duffy Binding Protein for Probing Protein Binding Function and Vaccine Development
Source: PubMed Central journal article supplement (PMC3681752; doi:10.1371/journal.ppat.1003420), 2013-06-13

**A COS-7-RBC binding inhibition assay**

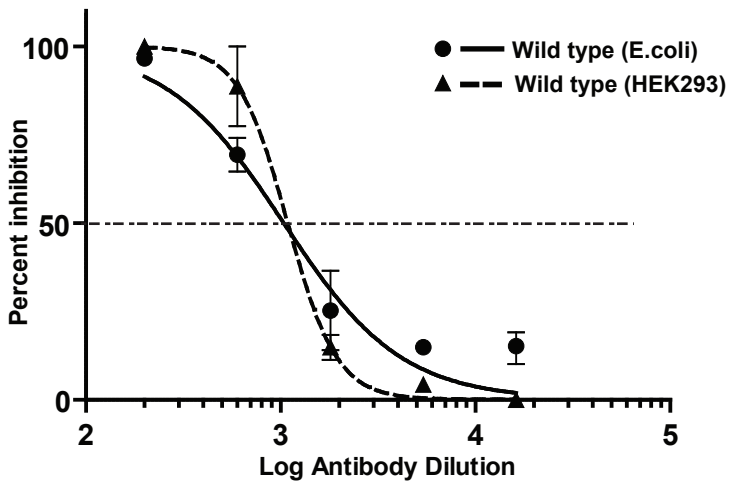

**B Yeast display binding inhibition assay**

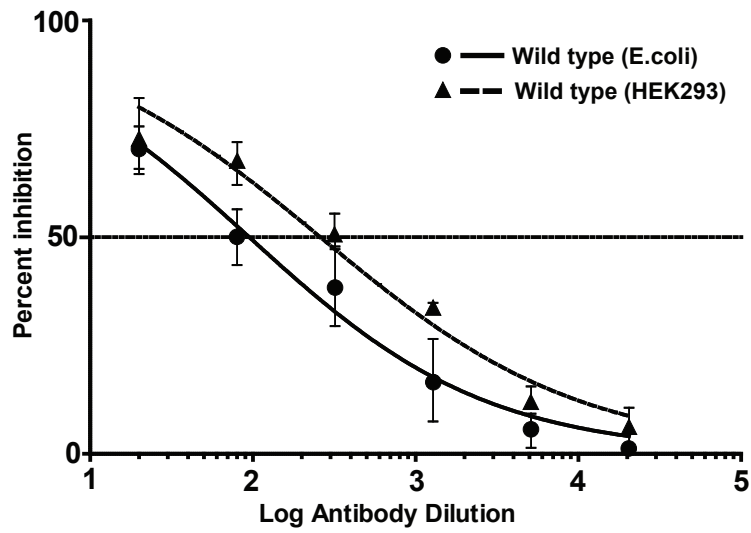

Supplement: ppat.1003420.s005.pdf [file ppat.1003420.s005.pdf]
