# Supplementary material for: Glycan Masking of Plasmodium vivax Duffy Binding Protein for Probing Protein Binding Function and Vaccine Development
Source: PubMed Central journal article supplement (PMC3681752; doi:10.1371/journal.ppat.1003420), 2013-06-13
Supplement: ppat.1003420.s007.pdf [file ppat.1003420.s007.pdf]

**Table S1. Adhesion of PvDBP mutants to DARC**

| Mutation                  | Location <sup>1</sup> | Orientation of amino acid <sup>2</sup> | Reduction on DARC binding <sup>6</sup> | Reference                     |
|---------------------------|-----------------------|----------------------------------------|----------------------------------------|-------------------------------|
| <b>▲198-216</b>           | SD1                   |                                        | none                                   | Bolton et al. Virology J 2011 |
| <b>▲198-247</b>           | SD1                   |                                        | major                                  | Bolton et al. Virology J 2011 |
| <b>▲198-216, ▲248-522</b> | SD1, SD2, & SD3       |                                        | major                                  | Bolton et al. Virology J 2011 |
| <b>▲216-247</b>           | SD1                   |                                        | major                                  | Bolton et al. Virology J 2011 |
| K220A,R223A,R226A         | SD1                   | surface                                | major                                  | Bolton et al. Virology J 2011 |
| K222A                     | SD1                   | surface (^) <sup>3</sup>               | none                                   | Bolton et al. Virology J 2011 |
| T232N                     | SD1                   | surface (*) <sup>4</sup>               | none                                   | this study                    |
| K234S                     | SD1                   | surface (^)                            | none                                   | this study                    |
| <b>▲248-522</b>           | SD2 & SD3             |                                        | major                                  | Bolton et al. Virology J 2011 |
| <b>E249R</b>              | SD1                   | surface (^)                            | none                                   | Batchelor et al. NSMB 2011    |
| <b>E249R,R274E</b>        | SD1 &SD2              | surface (^)                            | moderate                               | Batchelor et al. NSMB 2011    |
| L250A                     | SD1                   | buried                                 | none                                   | VanBuskirk et al. PNAS 2004   |
| T251A                     | SD1                   | surface (*)                            | none                                   | VanBuskirk et al. PNAS 2004   |
| V254A                     | SD1                   | No info <sup>5</sup>                   | minor                                  | VanBuskirk et al. PNAS 2004   |
| N255A                     | SD1                   | No info                                | minor                                  | VanBuskirk et al. PNAS 2004   |
| N256A                     | SD1                   | No info                                | minor                                  | VanBuskirk et al. PNAS 2004   |
| T257A                     | SD1                   | No info                                | minor                                  | VanBuskirk et al. PNAS 2004   |
| D258A                     | SD1                   | No info                                | moderate                               | VanBuskirk et al. PNAS 2004   |
| T259A                     | SD1                   | No info                                | moderate                               | VanBuskirk et al. PNAS 2004   |
| N260A                     | SD1                   | No info                                | major                                  | VanBuskirk et al. PNAS 2004   |
| F261A                     | SD1                   | No info                                | major                                  | VanBuskirk et al. PNAS 2004   |
| D264N                     | SD1                   | No info                                | none                                   | this study                    |
| T266A                     | SD2                   | surface (*)                            | none                                   | VanBuskirk et al. PNAS 2004   |
| F267A                     | SD2                   | surface (*)                            | none                                   | VanBuskirk et al. PNAS 2004   |
| L270A                     | SD2                   | surface (*)                            | none                                   | VanBuskirk et al. PNAS 2004   |
| Y271A                     | SD2                   | surface (^)                            | none                                   | VanBuskirk et al. PNAS 2004   |
| L272A                     | SD2                   | buried                                 | major                                  | VanBuskirk et al. PNAS 2004   |
| <b>K273A</b>              | SD2                   | surface (^)                            | major                                  | VanBuskirk et al. PNAS 2004   |
| <b>K273A</b>              | SD2                   | surface (^)                            | moderate                               | Batchelor et al. NSMB 2011    |
| <b>R274A</b>              | SD2                   | surface (^)                            | none                                   | Hans et al. Mol Micro 2005    |
| <b>R274A</b>              | SD2                   | surface (^)                            | moderate                               | Batchelor et al. NSMB 2011    |
| <b>R274E</b>              | SD2                   | surface (^)                            | major                                  | Batchelor et al. NSMB 2011    |
| K275A                     | SD2                   | surface (^)                            | moderate                               | VanBuskirk et al. PNAS 2004   |
| L276A                     | SD2                   | buried                                 | moderate                               | VanBuskirk et al. PNAS 2004   |
| I277A                     | SD2                   | surface (*)                            | moderate                               | VanBuskirk et al. PNAS 2004   |
| L290A                     | SD2                   | buried                                 | none                                   | VanBuskirk et al. PNAS 2004   |
| <b>N291A</b>              | SD2                   | surface (*)                            | moderate                               | Hans et al. Mol Micro 2005    |
| <b>N291A</b>              | SD2                   | surface (*)                            | moderate                               | VanBuskirk et al. PNAS 2004   |
| N292A                     | SD2                   | surface (^)                            | none                                   | VanBuskirk et al. PNAS 2004   |
| <b>Y293A</b>              | SD2                   | surface (^)                            | none                                   | VanBuskirk et al. PNAS 2004   |
| <b>Y293A</b>              | SD2                   | surface (^)                            | minor                                  | Hans et al. Mol Micro 2005    |
| R294A                     | SD2                   | surface (^)                            | none                                   | VanBuskirk et al. PNAS 2004   |

|                    |     |             |          |                               |
|--------------------|-----|-------------|----------|-------------------------------|
| Y295A              | SD2 | surface (^) | major    | VanBuskirk et al. PNAS 2004   |
| N296A              | SD2 | surface (*) | moderate | VanBuskirk et al. PNAS 2004   |
| K297A              | SD2 | surface (^) | major    | VanBuskirk et al. PNAS 2004   |
| <b>F299A</b>       | SD2 | buried      | major    | VanBuskirk et al. PNAS 2004   |
| <b>F299A</b>       | SD2 | buried      | major    | Hans et al. Mol Micro 2005    |
| D302A              | SD2 | buried      | minor    | VanBuskirk et al. PNAS 2004   |
| I303A              | SD2 | buried      | major    | VanBuskirk et al. PNAS 2004   |
| R304A              | SD2 | surface (^) | major    | VanBuskirk et al. PNAS 2004   |
| V327A              | SD2 | surface (^) | none     | VanBuskirk et al. PNAS 2004   |
| V328A              | SD2 | buried      | none     | VanBuskirk et al. PNAS 2004   |
| E329A              | SD2 | surface (*) | major    | VanBuskirk et al. PNAS 2004   |
| N330A              | SD2 | surface (^) | major    | VanBuskirk et al. PNAS 2004   |
| D339A              | SD2 | surface (^) | minor    | Hans et al. Mol Micro 2005    |
| <b>E340A</b>       | SD2 | surface (^) | none     | Hans et al. Mol Micro 2005    |
| <b>E340A</b>       | SD2 | surface (^) | none     | VanBuskirk et al. PNAS 2004   |
| <b>K341A</b>       | SD2 | surface (^) | none     | VanBuskirk et al. PNAS 2004   |
| <b>K341N</b>       | SD2 | surface (^) | none     | this study                    |
| <b>Q343A</b>       | SD2 | surface (^) | none     | VanBuskirk et al. PNAS 2004   |
| <b>Q343S</b>       | SD2 | surface (^) | none     | this study                    |
| <b>Q344A</b>       | SD2 | surface (^) | none     | VanBuskirk et al. PNAS 2004   |
| <b>Q344A</b>       | SD2 | surface (^) | none     | Hans et al. Mol Micro 2005    |
| R345A              | SD2 | surface (^) | none     | VanBuskirk et al. PNAS 2004   |
| K347A              | SD2 | surface (^) | none     | VanBuskirk et al. PNAS 2004   |
| <b>Q348A</b>       | SD2 | surface (^) | none     | VanBuskirk et al. PNAS 2004   |
| <b>Q348A</b>       | SD2 | surface (^) | none     | Hans et al. Mol Micro 2005    |
| W350A              | SD2 | buried      | major    | VanBuskirk et al. PNAS 2004   |
| <b>N351A</b>       | SD2 | surface (^) | minor    | VanBuskirk et al. PNAS 2004   |
| <b>N351A</b>       | SD2 | surface (^) | none     | Batchelor et al. NSMB 2011    |
| E352A              | SD2 | surface (^) | minor    | VanBuskirk et al. PNAS 2004   |
| K354A              | SD2 | surface (^) | none     | Batchelor et al. NSMB 2011    |
| Q356A              | SD2 | surface (^) | none     | Batchelor et al. NSMB 2011    |
| Y363A              | SD2 | surface (^) | major    | Hans et al. Mol Micro 2005    |
| S364A              | SD2 | surface (^) | moderate | VanBuskirk et al. PNAS 2004   |
| V365A              | SD2 | surface (*) | moderate | VanBuskirk et al. PNAS 2004   |
| K366A              | SD2 | No info     | major    | VanBuskirk et al. PNAS 2004   |
| <b>K367A,K370A</b> | SD2 | No info     | none     | Bolton et al. Virology J 2011 |
| <b>K367A</b>       | SD2 | No info     | major    | VanBuskirk et al. PNAS 2004   |
| R368A              | SD2 | No info     | moderate | VanBuskirk et al. PNAS 2004   |
| L369A              | SD2 | No info     | major    | VanBuskirk et al. PNAS 2004   |
| K370A              | SD2 | No info     | none     | VanBuskirk et al. PNAS 2004   |
| F373A              | SD2 | No info     | major    | Hans et al. Mol Micro 2005    |
| I374N,I376T        | SD2 | No info     | major    | this study                    |
| I376A              | SD2 | No info     | major    | Hans et al. Mol Micro 2005    |
| C377A              | SD2 | surface (*) | none     | VanBuskirk et al. PNAS 2004   |
| N384A              | SD2 | surface (^) | none     | Batchelor et al. NSMB 2011    |
| Q388A              | SD3 | buried      | moderate | VanBuskirk et al. PNAS 2004   |
| Y390A              | SD3 | buried      | moderate | VanBuskirk et al. PNAS 2004   |

|                                                                           |                 |             |          |                             |
|---------------------------------------------------------------------------|-----------------|-------------|----------|-----------------------------|
| R391A                                                                     | SD3             | buried      | minor    | VanBuskirk et al. PNAS 2004 |
| R394A                                                                     | SD3             | surface (^) | moderate | VanBuskirk et al. PNAS 2004 |
| E395A                                                                     | SD3             | buried      | moderate | VanBuskirk et al. PNAS 2004 |
| W396A                                                                     | SD3             | buried      | moderate | VanBuskirk et al. PNAS 2004 |
| G397A                                                                     | SD3             | buried      | minor    | VanBuskirk et al. PNAS 2004 |
| R398A                                                                     | SD3             | surface (^) | none     | Hans et al. Mol Micro 2005  |
| D399A                                                                     | SD3             | buried      | minor    | VanBuskirk et al. PNAS 2004 |
| Y400A                                                                     | SD3             | buried      | minor    | VanBuskirk et al. PNAS 2004 |
| V401A                                                                     | SD3             | surface (^) | minor    | VanBuskirk et al. PNAS 2004 |
| S402A                                                                     | SD3             | surface (^) | none     | VanBuskirk et al. PNAS 2004 |
| E403A                                                                     | SD3             | surface (^) | none     | VanBuskirk et al. PNAS 2004 |
| L404A                                                                     | SD3             | buried      | none     | VanBuskirk et al. PNAS 2004 |
| P405A                                                                     | SD3             | surface (^) | none     | VanBuskirk et al. PNAS 2004 |
| T406A                                                                     | SD3             | surface (^) | none     | VanBuskirk et al. PNAS 2004 |
| E407A                                                                     | SD3             | surface (*) | none     | VanBuskirk et al. PNAS 2004 |
| V408A                                                                     | SD3             | buried      | none     | VanBuskirk et al. PNAS 2004 |
| K412N                                                                     | SD3             | surface (^) | none     | this study                  |
| E413A                                                                     | SD3             | surface (^) | none     | VanBuskirk et al. PNAS 2004 |
| <b>K414A</b>                                                              | SD3             | surface (^) | none     | VanBuskirk et al. PNAS 2004 |
| <b>K414S</b>                                                              | SD3             | surface (^) | none     | this study                  |
| I419A                                                                     | SD3             | surface (^) | none     | VanBuskirk et al. PNAS 2004 |
| N420A                                                                     | SD3             | surface (*) | none     | VanBuskirk et al. PNAS 2004 |
| K425A                                                                     | SD3             | surface (^) | none     | VanBuskirk et al. PNAS 2004 |
| V426A                                                                     | SD3             | surface (*) | none     | VanBuskirk et al. PNAS 2004 |
| E464S                                                                     | SD3             | surface (^) | none     | this study                  |
| Q467N                                                                     | SD3             | surface (^) | none     | this study                  |
| A469T                                                                     | SD3             | surface (^) | none     | this study                  |
| V488T                                                                     | SD3             | surface (^) | none     | this study                  |
| R497S                                                                     | SD3             | surface (^) | none     | this study                  |
| D264N,E464S,V488T                                                         | SD2 & SD3       | surface     | none     | this study                  |
| T232N,K234S,D264N,K341N,<br>Q343S,K412N,K414S,Q467N,<br>A469T,V488T,R497S | SD1, SD2, & SD3 | surface     | none     | this study                  |

<sup>1</sup> subdomain designations according to Singh et al. Nature 2006

<sup>2</sup> designation of orientation of amino acid is according to 3RRC.pdb

<sup>3</sup> ^ means surface exposed "R" group

<sup>4</sup> \* means buried amino acid or the "R" group is not directed outward

<sup>5</sup> no info means no structural information is available due to the absence of density in PvDBP11 crystal structure 3RRC.pdb

<sup>6</sup> reduction of DARC binding is as described in Hans et al., Bolton et al., Batchelor et al., and this study where none is 70-100% binding, minor is 50-70% binding, moderate is 30-50% binding, and major is less than 30% binding. Reduction of DARC binding for VanBuskirk et al. is as described in their manuscript where none is 90-100% binding, minor effect is 50-90% binding, moderate is 5-50% binding, and major is 0-5% binding
