# Supplementary material for: Glycan Masking of Plasmodium vivax Duffy Binding Protein for Probing Protein Binding Function and Vaccine Development
Source: PubMed Central journal article supplement (PMC3681752; doi:10.1371/journal.ppat.1003420), 2013-06-13
Supplement: ppat.1003420.s008.pdf [file ppat.1003420.s008.pdf]

**TABLE S2. Immunization schedule**

| Immunization                           | Immunogen                     | Group | Animal | No. of animals | No. of Immunizations |         | Dose ( $\mu$ g) |         |
|----------------------------------------|-------------------------------|-------|--------|----------------|----------------------|---------|-----------------|---------|
|                                        |                               |       |        |                | DNA                  | Protein | DNA             | Protein |
| Protein <sup>1</sup>                   | Wt ( <i>E. coli</i> refolded) | 1     | Mouse  | 10             |                      | 4       |                 | 10      |
| Protein <sup>1</sup>                   | Wt (HEK293)                   | 2     | Mouse  | 10             |                      | 4       |                 | 5       |
| DNA <sup>2</sup> ,Protein <sup>1</sup> | Wt (HEK293)                   | 3     | Mouse  | 10             | 4                    | 2       | 20              | 2.5     |
| DNA <sup>2</sup> ,Protein <sup>1</sup> | STBP glycan                   | 4     | Mouse  | 10             | 4                    | 2       | 20              | 2.5     |
| DNA <sup>2</sup> ,Protein <sup>1</sup> | P1                            | 5     | Mouse  | 10             | 4                    | 2       | 20              | 2.5     |
| DNA <sup>2</sup> ,Protein <sup>1</sup> | MAX                           | 6     | Mouse  | 10             | 4                    | 2       | 20              | 2.5     |

<sup>1</sup>: immunization was intramuscular

<sup>2</sup>: immunization was by DNA electroporation
