# Supplementary material for: Glycan Masking of Plasmodium vivax Duffy Binding Protein for Probing Protein Binding Function and Vaccine Development
Source: PubMed Central journal article supplement (PMC3681752; doi:10.1371/journal.ppat.1003420), 2013-06-13
Supplement: ppat.1003420.s009.pdf [file ppat.1003420.s009.pdf]

**Table S3. IC50 of DBPII glycosylation variants.**

| Immunogen                       | COS-7-RBC binding inhibition assay |                 | Yeast display            |       | Effect of DARC phenotype |       |       |       |
|---------------------------------|------------------------------------|-----------------|--------------------------|-------|--------------------------|-------|-------|-------|
|                                 |                                    |                 | binding inhibition assay |       | FyA                      |       | FyB   |       |
|                                 | IC50 <sup>1</sup>                  | SD <sup>2</sup> | IC50                     | SD    | IC50                     | SD    | IC50  | SD    |
| Wild type (HEK293) <sup>3</sup> | 2589                               | 8.03            | 32.71                    | 21.45 | 1203                     | 34.85 | 442.7 | 33.6  |
| STBP glycan <sup>3</sup>        | 2787                               | 13.82           | 34.12                    | 23.32 | 435.9                    | 32.67 | 408   | 28.92 |
| P1 <sup>3</sup>                 | 2837                               | 10.11           | 199.4                    | 31.01 | 1237                     | 40.14 | 459.7 | 42.91 |
| Max <sup>3</sup>                | 2110                               | 8.53            | 668.6                    | 27.5  | 926.7                    | 35.72 | 273.4 | 35.31 |

<sup>1</sup>plasma dilution at 50% inhibition

<sup>2</sup>standard deviation

<sup>3</sup>DNA immunization,protein boost
